# Supplementary material for: Steady-state neuron-predominant LINE-1 encoded ORF1p protein and LINE-1 RNA increase with aging in the mouse and human brain
Source: eLife. 2025 Sep 25;13:RP100687. doi: 10.7554/eLife.100687 (PMC12463392; doi:10.7554/eLife.100687)
Supplement: Supplementary file 2. [file elife-100687-supp2.xlsx]

## Sheet: MassSpectrometryData
Gene ref	Gene Name	Ratio	Pvalue	MW	Description	∞ : proteins only found in IP-ORF1p samples and not in the IP-control samples, not allowing for the calculation of a ratio with p-value.
A0A2I3BQ48	DGKH	∞	-	130.1	Diacylglycerol kinase Mus musculus
A0A571BF58	NEB	∞	-	871.2	SH3 domain-containing protein Mus musculus
A0A5F8MPP0	PLEKHG1	∞	-	164.1	Pleckstrin homology domain containing, family G (with RhoGef domain) member 1 Mus musculus
A2A6T1	CDR2L	∞	-	53.2	Cerebellar degeneration-related protein 2-like Mus musculus
A2AAX3	KLHL15	∞	-	69.7	Kelch-like protein 15 Mus musculus
A2AF47	DOCK11	∞	-	237.8	Dedicator of cytokinesis protein 11 Mus musculus
A2AHC3	CAMSAP1	∞	-	175.9	Calmodulin-regulated spectrin-associated protein 1 Mus musculus
A2AI08	TPRN	∞	-	80.1	Taperin Mus musculus
A2AJK6	CHD7	∞	-	334.1	Chromodomain-helicase-DNA-binding protein 7 Mus musculus
A2ALK8	PTPN3	∞	-	103.9	Tyrosine-protein phosphatase non-receptor type 3 Mus musculus
A2ALS5	RAP1GAP	∞	-	73.4	Rap1 GTPase-activating protein 1 Mus musculus
A2APX8	SCN1A	∞	-	228.8	Sodium channel protein type 1 subunit alpha Mus musculus
A2AQ25	SKT	27.76	1.1e-107	213	Sickle tail protein Mus musculus
A2ASZ8	SLC25A25	∞	-	52.6	Calcium-binding mitochondrial carrier protein SCaMC-2 Mus musculus
A2AV25	FIBCD1	∞	-	50.6	Fibrinogen C domain-containing protein 1 Mus musculus
A2BH40	ARID1A	∞	-	242.1	AT-rich interactive domain-containing protein 1A Mus musculus
B1AWC9	PDE4B	∞	-	83.3	Phosphodiesterase Mus musculus
B2RR83	YTHDC2	∞	-	161.1	3'-5' RNA helicase YTHDC2 Mus musculus
D3YXK0	JAKMIP2	∞	-	96.3	Janus kinase and microtubule-interacting protein 2 Mus musculus
D3YZG8	MTHFD2L	∞	-	36.4	Probable bifunctional methylenetetrahydrofolate dehydrogenase/cyclohydrolase 2 Mus musculus
E9PUQ8	DGKD	∞	-	135.2	Diacylglycerol kinase Mus musculus
E9PZP8	HERC1	∞	-	532.7	HECT and RLD domain-containing E3 ubiquitin protein ligase family member 1 Mus musculus
E9Q0S6	TNS1	∞	-	201.4	Tensin 1 Mus musculus
E9Q1M1	PDZD2	∞	-	296.7	PDZ domain-containing 2 Mus musculus
E9Q236	ABCC4	∞	-	148.9	ATP-binding cassette, sub-family C (CFTR/MRP), member 4 Mus musculus
E9Q401	RYR2	∞	-	564.8	Ryanodine receptor 2 Mus musculus
E9Q4N7	ARID1B	∞	-	237.8	AT-rich interactive domain-containing protein 1B Mus musculus
E9Q6P5	TTC7B	∞	-	94.2	Tetratricopeptide repeat protein 7B Mus musculus
E9Q6R7	UTRN	∞	-	392.7	Utrophin Mus musculus
E9Q8I9	FRY	∞	-	339.1	Protein furry homolog Mus musculus
E9Q9B3	SPRYD3	∞	-	49.7	SPRY domain-containing 3 Mus musculus
E9Q9B7	KIDINS220	∞	-	199.2	ANK_REP_REGION domain-containing protein Mus musculus
E9Q9K8	AKAP6	∞	-	254.3	A kinase (PRKA) anchor protein 6 Mus musculus
E9Q9R9	DLG5	∞	-	214.4	Disks large homolog 5 Mus musculus
F2Z3U3	RAPH1	∞	-	136.7	Ras association (RalGDS/AF-6) and pleckstrin homology domains 1 Mus musculus
F7BAB2	TMEM132B	∞	-	119.3	Transmembrane protein 132B Mus musculus
F8VPN4	AGL	∞	-	174.3	Amylo-1,6-glucosidase, 4-alpha-glucanotransferase Mus musculus
F8VPP8	ZC3H7B	∞	-	110.3	Zinc finger CCCH type-containing 7B Mus musculus
F8VQB6	MYO1	∞	-	237.3	Unconventional myosin-X Mus musculus
F8VQK3	GUCY1A2	∞	-	81.8	Guanylate cyclase domain-containing protein Mus musculus
G3X9I7	ZC3H12B	∞	-	93.9	Zinc finger CCCH-type-containing 12B Mus musculus
J9S314	TRPM3	∞	-	197.5	Transient receptor potential cation channel, subfamily M, member 3 Mus musculus
O08576	RUNDC3A	∞	-	50	RUN domain-containing protein 3A Mus musculus
O08672	KIFC2	∞	-	85.7	Kinesin-like protein KIFC2 Mus musculus
O09161	CASQ2	∞	-	48.2	Calsequestrin-2 Mus musculus
O35066	KIF3C	∞	-	90	Kinesin-like protein KIF3C Mus musculus
O35099	MAP3K5	∞	-	154.5	Mitogen-activated protein kinase kinase kinase 5 Mus musculus
O35231	KIFC3	∞	-	92.6	Kinesin-like protein KIFC3 Mus musculus
O35643	AP1B1	∞	-	103.9	AP-1 complex subunit beta-1 Mus musculus
O35874	SLC1A4	∞	-	56.1	Neutral amino acid transporter A Mus musculus
O54781	SRPK2	∞	-	76.8	SRSF protein kinase 2 Mus musculus
O54828	RGS9	∞	-	77	Regulator of G-protein signaling 9 Mus musculus
O54865	GUCY1B3	∞	-	70.6	Guanylate cyclase soluble subunit beta-1 Mus musculus
O70161	PIP5K1C	∞	-	72.4	Phosphatidylinositol 4-phosphate 5-kinase type-1 gamma Mus musculus
O70305	ATXN2	∞	-	136.5	Ataxin-2 Mus musculus
O70378	EMC8	∞	-	23.3	ER membrane protein complex subunit 8 Mus musculus
O70405	ULK1	∞	-	112.5	Serine/threonine-protein kinase ULK1 Mus musculus
O88196	TTC3	∞	-	223.9	E3 ubiquitin-protein ligase TTC3 Mus musculus
O88384	VTI1B	∞	-	26.7	Vesicle transport through interaction with t-SNAREs homolog 1B Mus musculus
O88441	MTX2	∞	-	29.8	Metaxin-2 Mus musculus
O88532	ZFR	∞	-	116.9	Zinc finger RNA-binding protein Mus musculus
O88951	LIN7B	∞	-	22.9	Protein lin-7 homolog B Mus musculus
O89084	PDE4A	∞	-	93.6	cAMP-specific 3',5'-cyclic phosphodiesterase 4A Mus musculus
P05784	KRT18	∞	-	47.5	Keratin, type I cytoskeletal 18 Mus musculus
P08775	POLR2A	∞	-	217.2	DNA-directed RNA polymerase II subunit RPB1 Mus musculus
P0C673	IGSF11	∞	-	46.1	Immunoglobulin superfamily member 11 Mus musculus
P11260	L1RE1	∞	-	41.2	LINE-1 retrotransposable element ORF1 protein Mus musculus
P11531	DMD	∞	-	425.8	Dystrophin Mus musculus
P11679	KRT8	∞	-	54.6	Keratin, type II cytoskeletal 8 Mus musculus
P16283	SLC4A3	∞	-	135.4	Anion exchange protein 3 Mus musculus
P28028	BRAF	∞	-	88.8	Serine/threonine-protein kinase B-raf Mus musculus
P28653	BGN	∞	-	41.6	Biglycan Mus musculus
P28654	DCN	∞	-	39.8	Decorin Mus musculus
P28741	KIF3A	∞	-	80.2	Kinesin-like protein KIF3A Mus musculus
P29788	VTN	∞	-	54.8	Vitronectin Mus musculus
P35585	AP1M1	∞	-	48.5	AP-1 complex subunit mu-1 Mus musculus
P37040	POR	∞	-	77	NADPH--cytochrome P450 reductase Mus musculus
P39087	GRIK2	∞	-	102.5	Glutamate receptor ionotropic, kainate 2 Mus musculus
P43024	COX6A1	∞	-	12.4	Cytochrome c oxidase subunit 6A1, mitochondrial Mus musculus
P45481	CREBBP	∞	-	265.5	Histone lysine acetyltransferase CREBBP Mus musculus
P48725	PCNT	∞	-	329.5	Pericentrin Mus musculus
P52332	JAK1	∞	-	133.4	Tyrosine-protein kinase JAK1 Mus musculus
P54818	GALC	∞	-	77.3	Galactocerebrosidase Mus musculus
P55284	CDH5	∞	-	87.9	Cadherin-5 Mus musculus
P58390	KCNN2	∞	-	91.6	Small conductance calcium-activated potassium channel protein 2 Mus musculus
P58391	KCNN3	∞	-	81.3	Small conductance calcium-activated potassium channel protein 3 Mus musculus
P59759	MKL2	∞	-	117.5	Myocardin-related transcription factor B Mus musculus
P60191	RIMS4	∞	-	29.3	Regulating synaptic membrane exocytosis protein 4 Mus musculus
P62046	LRCH1	∞	-	79.1	Leucine-rich repeat and calponin homology domain-containing protein 1 Mus musculus
P62880	GNB2	∞	-	37.3	Guanine nucleotide-binding protein G(I)/G(S)/G(T) subunit beta-2 Mus musculus
P70188	KIFAP3	∞	-	91.3	Kinesin-associated protein 3 Mus musculus
P70248	MYO1F	∞	-	125.9	Unconventional myosin-If Mus musculus
P70257	NFIX	∞	-	53.4	Nuclear factor 1 X-type Mus musculus
P70271	PDLIM4	∞	-	35.6	PDZ and LIM domain protein 4 Mus musculus
P70297	STAM	∞	-	59.8	Signal transducing adapter molecule 1 Mus musculus
P80560	PTPRN2	∞	-	111.5	Receptor-type tyrosine-protein phosphatase N2 Mus musculus
P97291	CDH8	∞	-	88.2	Cadherin-8 Mus musculus
P97412	LYST	∞	-	425.3	Lysosomal-trafficking regulator Mus musculus
P97467	PAM	∞	-	109	Peptidyl-glycine alpha-amidating monooxygenase Mus musculus
P97473	TARBP2	∞	-	38.8	RISC-loading complex subunit TARBP2 Mus musculus
P97760	POLR2C	∞	-	31.4	DNA-directed RNA polymerase II subunit RPB3 Mus musculus
P98084	APBA2	∞	-	82.8	Amyloid-beta A4 precursor protein-binding family A member 2 Mus musculus
Q00623	APOA1	∞	-	30.6	Apolipoprotein A-I Mus musculus
Q01405	SEC23A	∞	-	86.2	Protein transport protein Sec23A Mus musculus
Q03137	EPHA4	∞	-	109.8	Ephrin type-A receptor 4 Mus musculus
Q03173	ENAH	∞	-	85.8	Protein enabled homolog Mus musculus
Q03717	KCNB	∞	-	95.6	Potassium voltage-gated channel subfamily B member 1 Mus musculus
Q04735	CDK16	∞	-	55.9	Cyclin-dependent kinase 16 Mus musculus
Q04859	MAK	∞	-	70.1	Serine/threonine-protein kinase MAK Mus musculus
Q05860	FMN1	∞	-	163.6	Formin-1 Mus musculus
Q0VAV2	EXPH	∞	-	217.6	Exophilin-5 Mus musculus
Q0VGU4	VGF	∞	-	68.2	MCG18019 Mus musculus
Q0VGY8	TANC1	∞	-	200.8	Protein TANC1 Mus musculus
Q14BI2	GRM2	∞	-	95.9	Metabotropic glutamate receptor 2 Mus musculus
Q2KN98	SPECC1L	19.96	1.2e-14	124.5	Cytospin-A Mus musculus
Q2PZL6	FAT4	∞	-	540.3	Protocadherin Fat 4 Mus musculus
Q3TDQ1	STT3B	∞	-	93.2	Dolichyl-diphosphooligosaccharide--protein glycosyltransferase subunit STT3B Mus musculus
Q3TE80	2410002F23RIK	∞	-	32.4	RIKEN cDNA 2410002F23 gene Mus musculus
Q3TL44	NLRX1	∞	-	107.8	NLR family member X1 Mus musculus
Q3TLI0	TRAPPC10	∞	-	141.6	Trafficking protein particle complex subunit 10 Mus musculus
Q3TRM4	PNPLA6	∞	-	149.5	Neuropathy target esterase Mus musculus
Q3TRR0	MAP9	∞	-	73.5	Microtubule-associated protein 9 Mus musculus
Q3TVI8	PBXIP1	∞	-	81.2	Pre-B-cell leukemia transcription factor-interacting protein 1 Mus musculus
Q3TY86	AIFM3	∞	-	66.8	Apoptosis-inducing factor 3 Mus musculus
Q3U0M1	TRAPPC9	∞	-	128.2	Trafficking protein particle complex subunit 9 Mus musculus
Q3U564	DCP1B	∞	-	62.7	mRNA-decapping enzyme 1B Mus musculus
Q3U5C7	PRICKLE1	∞	-	94.1	Prickle-like protein 1 Mus musculus
Q3UE31	MTUS2	∞	-	46	Uncharacterized protein KIAA0930 homolog Mus musculus
Q3UHC7	DAB2IP	∞	-	131.7	Disabled homolog 2-interacting protein Mus musculus
Q3UHD1	BAI1	∞	-	173.3	Adhesion G protein-coupled receptor B1 Mus musculus
Q3UHF7	HIVEP2	∞	-	266.7	Transcription factor HIVEP2 Mus musculus
Q3UHH1	ZSWIM8	∞	-	197.1	Zinc finger SWIM domain-containing protein 8 Mus musculus
Q3UHI0	CCSER2	∞	-	92.9	Serine-rich coiled-coil domain-containing protein 2 Mus musculus
Q3UHU5	SOGA2	∞	-	213.9	Microtubule cross-linking factor 1 Mus musculus
Q3UJB9	EDC4	∞	-	152.5	Enhancer of mRNA-decapping protein 4 Mus musculus
Q3ULB5	PAK6	∞	-	74.9	Serine/threonine-protein kinase PAK 6 Mus musculus
Q3ULW6	CCDC33	∞	-	110.2	Coiled-coil domain-containing protein 33 Mus musculus
Q3UMT1	PPP1R12C	∞	-	84.7	Protein phosphatase 1 regulatory subunit 12C Mus musculus
Q3UNH4	GPRIN1	∞	-	95.5	G protein-regulated inducer of neurite outgrowth 1 Mus musculus
Q3URD3	SLMAP	∞	-	96.9	Sarcolemmal membrane-associated protein Mus musculus
Q3USH1	FAM196A	∞	-	46.2	Inhibitory synaptic factor 2A Mus musculus
Q3UTQ8	CDKL5	19.58	3.7e-36	105.5	Cyclin-dependent kinase-like 5 Mus musculus
Q3UTZ3	MAP11	∞	-	62.8	Uncharacterized protein C7orf43 homolog Mus musculus
Q3UUF8	ANKRD34B	∞	-	55.4	Ankyrin repeat domain-containing protein 34B Mus musculus
Q3UV70	PDP1	∞	-	61.2	[Pyruvate dehydrogenase [acetyl-transferring]]-phosphatase 1, mitochondrial Mus musculus
Q3UVC0	KSR2	∞	-	108.6	Kinase suppressor of Ras 2 Mus musculus
Q3UVX5	GRM5	∞	-	131.9	Metabotropic glutamate receptor 5 Mus musculus
Q3V1U8	ELMOD1	∞	-	38	ELMO domain-containing protein 1 Mus musculus
Q499E5	STOX2	∞	-	102.8	Storkhead-box protein 2 Mus musculus
Q4QQM5	FAM73A	∞	-	67.5	Mitoguardin 1 Mus musculus
Q4U2R1	HERC2	∞	-	527.5	E3 ubiquitin-protein ligase HERC2 Mus musculus
Q4VAC9	PLEKHG3	∞	-	148.5	Pleckstrin homology domain-containing family G member 3 Mus musculus
Q505D1	ANKRD28	∞	-	112.9	Serine/threonine-protein phosphatase 6 regulatory ankyrin repeat subunit A Mus musculus
Q571I4	SGK223	∞	-	147.9	Inactive tyrosine-protein kinase PRAG1 Mus musculus
Q5DTY9	KCTD16	∞	-	49	BTB/POZ domain-containing protein KCTD16 Mus musculus
Q5DU14	MYO10	∞	-	211.4	Unconventional myosin-XVI Mus musculus
Q5HZI2	C2CD4C	∞	-	44.6	C2 calcium-dependent domain-containing protein 4C Mus musculus
Q5NBX1	COBL	∞	-	143.9	Protein cordon-bleu Mus musculus
Q5RJH3	CDH12	∞	-	88.5	Cadherin-12 Mus musculus
Q5RJH6	SMG7	∞	-	126.8	Protein SMG7 Mus musculus
Q5SUA5	MYO1G	∞	-	117.2	Unconventional myosin-Ig Mus musculus
Q5SW75	SSH2	∞	-	158.2	Protein phosphatase Slingshot homolog 2 Mus musculus
Q60737	CSNK2A1	13.21	1.1e-15	45.1	Casein kinase II subunit alpha Mus musculus
Q60770	STXBP3	∞	-	67.9	Syntaxin-binding protein 3 Mus musculus
Q60803	TRAF3	∞	-	64.3	TNF receptor-associated factor 3 Mus musculus
Q60841	RELN	∞	-	387.5	Reelin Mus musculus
Q60900	ELAVL3	∞	-	39.5	ELAV-like protein 3 Mus musculus
Q60996	PPP2R5C	∞	-	60.8	Serine/threonine-protein phosphatase 2A 56 kDa regulatory subunit gamma isoform Mus musculus
Q61033	TMPO	∞	-	75.2	Lamina-associated polypeptide 2, isoforms alpha/zeta Mus musculus
Q61315	APC	∞	-	311.1	Adenomatous polyposis coli protein Mus musculus
Q61334	BCAP29	∞	-	28	B-cell receptor-associated protein 29 Mus musculus
Q61464	ZNF638	∞	-	218.1	Zinc finger protein 638 Mus musculus
Q61771	KIF3B	∞	-	85.3	Kinesin-like protein KIF3B Mus musculus
Q62095	DDX3Y	∞	-	73.4	ATP-dependent RNA helicase DDX3Y Mus musculus
Q62120	JAK2	∞	-	130.2	Tyrosine-protein kinase JAK2 Mus musculus
Q62407	SPEG	∞	-	354.3	Striated muscle-specific serine/threonine-protein kinase Mus musculus
Q64012	RALY	∞	-	33.2	RNA-binding protein Raly Mus musculus
Q64096	MCF2L	∞	-	129.1	Guanine nucleotide exchange factor DBS Mus musculus
Q640Q5	PAN3	∞	-	89.7	PAN2-PAN3 deadenylation complex subunit Pan3 Mus musculus
Q641K5	NUAK1	∞	-	73.7	NUAK family SNF1-like kinase 1 Mus musculus
Q64337	SQSTM1	∞	-	48.2	Sequestosome-1 Mus musculus
Q64727	VCL	∞	-	116.7	Vinculin Mus musculus
Q65CL1	CTNNA3	∞	-	99.8	Catenin alpha-3 Mus musculus
Q67BT3	SLC13A5	∞	-	63.8	Solute carrier family 13 member 5 Mus musculus
Q68FF0	KIAA1841	∞	-	82	Uncharacterized protein KIAA1841 Mus musculus
Q69Z99	ZNF512	∞	-	63.9	Zinc finger protein 512 Mus musculus
Q69ZS8	KAZN	∞	-	86.7	Kazrin Mus musculus
Q6DFV5	HELZ	∞	-	219.9	Probable helicase with zinc finger domain Mus musculus
Q6DIC0	SMARCA2	∞	-	180.3	Probable global transcription activator SNF2L2 Mus musculus
Q6GQW0	BTBD11	∞	-	121.6	Ankyrin repeat and BTB/POZ domain-containing protein BTBD11 Mus musculus
Q6IMP4	PANX2	∞	-	74.6	Pannexin-2 Mus musculus
Q6NXI6	RPRD2	∞	-	156.6	Regulation of nuclear pre-mRNA domain-containing protein 2 Mus musculus
Q6NXJ0	WWC2	∞	-	132.6	Protein WWC2 Mus musculus
Q6P6I6	POLR2M	∞	-	41.2	DNA-directed RNA polymerase II subunit GRINL1A Mus musculus
Q6PAM0	PRKAB2	∞	-	30.2	5'-AMP-activated protein kinase subunit beta-2 Mus musculus
Q6PCX9	TRIM37	∞	-	107.7	E3 ubiquitin-protein ligase TRIM37 Mus musculus
Q6PCZ4	MAGEE1	∞	-	101.6	Melanoma-associated antigen E1 Mus musculus
Q6PD28	PPP2R5B	∞	-	57.3	Serine/threonine-protein phosphatase 2A 56 kDa regulatory subunit beta isoform Mus musculus
Q6PDG5	SMARCC2	∞	-	132.6	SWI/SNF complex subunit SMARCC2 Mus musculus
Q6PEE2	CTIF	∞	-	67.8	CBP80/20-dependent translation initiation factor Mus musculus
Q6PEM6	GRAMD3	∞	-	49.3	GRAM domain-containing protein 2B Mus musculus
Q6PHZ8	KCNIP4	∞	-	28.8	Kv channel-interacting protein 4 Mus musculus
Q6RHR9	MAGI1	∞	-	162	Membrane-associated guanylate kinase, WW and PDZ domain-containing protein 1 Mus musculus
Q6RI63	FAM120B	∞	-	89.3	Constitutive coactivator of peroxisome proliferator-activated receptor gamma Mus musculus
Q6Y7W8	GIGYF2	∞	-	149.2	GRB10-interacting GYF protein 2 Mus musculus
Q6ZPQ6	PITPNM2	∞	-	148	Membrane-associated phosphatidylinositol transfer protein 2 Mus musculus
Q6ZPY2	SMG5	∞	-	114.1	Protein SMG5 Mus musculus
Q6ZQ29	TAOK2	∞	-	139.3	Serine/threonine-protein kinase TAO2 Mus musculus
Q6ZQ58	LARP1	∞	-	121.1	La-related protein 1 Mus musculus
Q70FJ1	AKAP9	∞	-	436.2	A-kinase anchor protein 9 Mus musculus
Q70IV5	SYNM	∞	-	173.2	Synemin Mus musculus
Q76I79	SSH1	∞	-	115.3	Protein phosphatase Slingshot homolog 1 Mus musculus
Q7TME0	PLPPR4	∞	-	83.3	Phospholipid phosphatase-related protein type 4 Mus musculus
Q7TNM2	TRIM46	∞	-	83.4	Tripartite motif-containing protein 46 Mus musculus
Q7TPV4	MYBBP1A	∞	-	152	Myb-binding protein 1A Mus musculus
Q7TQ95	LNP	∞	-	47.5	Endoplasmic reticulum junction formation protein lunapark Mus musculus
Q7TQF2	FBXO10	∞	-	104.5	F-box only protein 10 Mus musculus
Q7TT37	IKBKAP	∞	-	149.6	Elongator complex protein 1 Mus musculus
Q7TT50	CDC42BPB	∞	-	194.8	Serine/threonine-protein kinase MRCK beta Mus musculus
Q80TF3	PCDH19	∞	-	126	Protocadherin-19 Mus musculus
Q80TL0	PPM1E	∞	-	83.4	Protein phosphatase 1E Mus musculus
Q80TM6	R3HDM2	∞	-	114.6	R3H domain-containing protein 2 Mus musculus
Q80TM9	NISCH	∞	-	175	Nischarin Mus musculus
Q80TN7	NAV3	∞	-	252.3	Neuron navigator 3 Mus musculus
Q80TT8	CUL9	∞	-	209.2	Cullin-9 Mus musculus
Q80TV8	CLASP1	∞	-	169.2	CLIP-associating protein 1 Mus musculus
Q80TZ9	RERE	∞	-	171.8	Arginine-glutamic acid dipeptide repeats protein Mus musculus
Q80U04	PJA2	∞	-	78	E3 ubiquitin-protein ligase Praja-2 Mus musculus
Q80U19	DAAM2	∞	-	128.4	Disheveled-associated activator of morphogenesis 2 Mus musculus
Q80U59	KIAA0232	∞	-	154.8	Uncharacterized protein KIAA0232 Mus musculus
Q80UK0	SESTD1	∞	-	79.4	SEC14 domain and spectrin repeat-containing protein 1 Mus musculus
Q80V91	DTX3	∞	-	38	Probable E3 ubiquitin-protein ligase DTX3 Mus musculus
Q80W47	WIPI2	∞	-	48.5	WD repeat domain phosphoinositide-interacting protein 2 Mus musculus
Q80WG5	LRRC8A	∞	-	94.1	Volume-regulated anion channel subunit LRRC8A Mus musculus
Q80X66	BTBD10	∞	-	53.8	BTB/POZ domain-containing protein 10 Mus musculus
Q80Y83	DIXDC1	∞	-	80.2	Dixin Mus musculus
Q80YA3	DDHD1	∞	-	61.8	Phospholipase DDHD1 Mus musculus
Q80YE7	DAPK1	∞	-	161.4	Death-associated protein kinase 1 Mus musculus
Q80YF9	ARHGAP33	∞	-	139.8	Rho GTPase-activating protein 33 Mus musculus
Q80YT7	PDE4DIP	∞	-	250.6	Myomegalin Mus musculus
Q80ZJ7	SNX32	∞	-	46.6	Sorting nexin-32 Mus musculus
Q80ZM5	H1F	∞	-	20.2	H15 domain-containing protein Mus musculus
Q80ZX0	SEC24B	∞	-	135.6	Sec24-related gene family, member B (S. cerevisiae) Mus musculus
Q8BG89	ZNF365	∞	-	46.9	Protein ZNF365 Mus musculus
Q8BH15	CNOT10	∞	-	81.8	CCR4-NOT transcription complex subunit 10 Mus musculus
Q8BI72	CDKN2AIP	∞	-	59.7	CDKN2A-interacting protein Mus musculus
Q8BIE6	FRMD4A	∞	-	113.9	FERM domain-containing protein 4A Mus musculus
Q8BJA3	HMBOX1	∞	-	47.1	Homeobox-containing protein 1 Mus musculus
Q8BK72	MRPS27	∞	-	47.8	28S ribosomal protein S27, mitochondrial Mus musculus
Q8BL06	USP54	∞	-	176.7	Inactive ubiquitin carboxyl-terminal hydrolase 54 Mus musculus
Q8BL66	EEA1	∞	-	160.9	Early endosome antigen 1 Mus musculus
Q8BLN6	UNC80	∞	-	363.5	Protein unc-80 homolog Mus musculus
Q8BM13	OLFM2	∞	-	50.7	Noelin-2 Mus musculus
Q8BM92	CDH7	∞	-	87.2	Cadherin-7 Mus musculus
Q8BMB3	EIF4E2	∞	-	28.3	Eukaryotic translation initiation factor 4E type 2 Mus musculus
Q8BML1	MICAL2	∞	-	110.1	[F-actin]-monooxygenase MICAL2 Mus musculus
Q8BNA6	FAT3	∞	-	502	Protocadherin Fat 3 Mus musculus
Q8BNN1	SPATA2L	∞	-	46.8	Spermatogenesis-associated protein 2-like protein Mus musculus
Q8BPU7	ELMO1	∞	-	83.9	Engulfment and cell motility protein 1 Mus musculus
Q8BQM8	EML5	∞	-	220.1	Echinoderm microtubule-associated protein-like 5 Mus musculus
Q8BQZ5	CPSF4	∞	-	23.7	Cleavage and polyadenylation specificity factor subunit 4 Mus musculus
Q8BRK8	PRKAA2	∞	-	62	5'-AMP-activated protein kinase catalytic subunit alpha-2 Mus musculus
Q8BSL7	ARF2	∞	-	20.7	ADP-ribosylation factor 2 Mus musculus
Q8BTY2	SLC4A7	∞	-	116.5	Sodium bicarbonate cotransporter 3 Mus musculus
Q8BUM6	FAM163B	∞	-	18.3	Protein FAM163B Mus musculus
Q8BW41	POMGNT2	∞	-	69.4	Protein O-linked-mannose beta-1,4-N-acetylglucosaminyltransferase 2 Mus musculus
Q8BX02	KANK2	∞	-	90.2	KN motif and ankyrin repeat domain-containing protein 2 Mus musculus
Q8BXL9	IFFO1	∞	-	62.4	Intermediate filament family orphan 1 Mus musculus
Q8BZ05	ARAP2	∞	-	193.4	Arf-GAP with Rho-GAP domain, ANK repeat and PH domain-containing protein 2 Mus musculus
Q8BZ60	STON2	∞	-	99.6	Stonin-2 Mus musculus
Q8BZI0	AFAP1L1	∞	-	86.6	Actin filament-associated protein 1-like 1 Mus musculus
Q8BZZ3	WWP1	∞	-	104.7	NEDD4-like E3 ubiquitin-protein ligase WWP1 Mus musculus
Q8C008	DZANK1	∞	-	85	Double zinc ribbon and ankyrin repeat-containing protein 1 Mus musculus
Q8C079	STRIP1	∞	-	95.6	Striatin-interacting protein 1 Mus musculus
Q8C080	SNX16	∞	-	38.8	Sorting nexin-16 Mus musculus
Q8C0D9	CEP68	∞	-	78.7	Centrosomal protein of 68 kDa Mus musculus
Q8C0L0	TMX4	∞	-	37.1	Thioredoxin-related transmembrane protein 4 Mus musculus
Q8C170	MYO9A	∞	-	292.1	Unconventional myosin-IXa Mus musculus
Q8C1B1	CAMSAP2	∞	-	164.3	Calmodulin-regulated spectrin-associated protein 2 Mus musculus
Q8C5Q4	GRSF1	∞	-	53.1	G-rich sequence factor 1 Mus musculus
Q8C753	KIAA0556	∞	-	179.6	Protein KIAA0556 Mus musculus
Q8C863	ITCH	∞	-	99	E3 ubiquitin-protein ligase Itchy Mus musculus
Q8C9H6	STRIP2	∞	-	96.3	Striatin-interacting proteins 2 Mus musculus
Q8CA95	PDE10A	∞	-	89.4	cAMP and cAMP-inhibited cGMP 3',5'-cyclic phosphodiesterase 10A Mus musculus
Q8CCJ4	AMER2	∞	-	69.9	APC membrane recruitment protein 2 Mus musculus
Q8CCN5	BCAS3	∞	-	101	Breast carcinoma-amplified sequence 3 homolog Mus musculus
Q8CDG3	VCPIP1	∞	-	134.5	Deubiquitinating protein VCIP135 Mus musculus
Q8CFI7	POL2RB	∞	-	133.9	DNA-directed RNA polymerase II subunit RPB2 Mus musculus
Q8CGM1	BAI2	∞	-	169.9	Adhesion G protein-coupled receptor B2 Mus musculus
Q8CGU1	CALCOCO1	∞	-	77.3	Calcium-binding and coiled-coil domain-containing protein 1 Mus musculus
Q8CH09	SUGP2	∞	-	118.1	SURP and G-patch domain-containing protein 2 Mus musculus
Q8CI59	STEAP3	∞	-	54.7	Metalloreductase STEAP3 Mus musculus
Q8CI78	RMND1	∞	-	51.8	Required for meiotic nuclear division protein 1 homolog Mus musculus
Q8CIW6	SLC26A6	∞	-	82.8	Solute carrier family 26 member 6 Mus musculus
Q8CJ67	STAU2	∞	-	62.5	Double-stranded RNA-binding protein Staufen homolog 2 Mus musculus
Q8JZR6	SLC4A8	∞	-	122.4	Electroneutral sodium bicarbonate exchanger 1 Mus musculus
Q8JZW5	SH2D5	∞	-	47.4	SH2 domain-containing protein 5 Mus musculus
Q8K004	SPATA2	∞	-	57.8	Spermatogenesis-associated protein 2 Mus musculus
Q8K1S6	SPIRE2	∞	-	80.2	Protein spire homolog 2 Mus musculus
Q8K224	NAT10	∞	-	115.4	RNA cytidine acetyltransferase Mus musculus
Q8K2D3	EDC3	∞	-	56	Enhancer of mRNA-decapping protein 3 Mus musculus
Q8K2J0	PLCD3	∞	-	88.6	1-phosphatidylinositol 4,5-bisphosphate phosphodiesterase delta-3 Mus musculus
Q8K2Y0	RNF219	∞	-	80	ORC ubiquitin ligase 1 Mus musculus
Q8K3B1	FBXO45	∞	-	30.6	F-box/SPRY domain-containing protein 1 Mus musculus
Q8K3E5	AHI1	∞	-	119.7	Jouberin Mus musculus
Q8K3I4	MYRIP	∞	-	94.9	Rab effector MyRIP Mus musculus
Q8K4P0	WDR33	∞	-	145.3	pre-mRNA 3' end processing protein WDR33 Mus musculus
Q8K4P8	HECW1	∞	-	179.5	E3 ubiquitin-protein ligase HECW1 Mus musculus
Q8R0G9	NUP133	∞	-	128.6	Nuclear pore complex protein Nup133 Mus musculus
Q8R1G6	PDLIM2	∞	-	37.7	PDZ and LIM domain protein 2 Mus musculus
Q8R4C2	RUFY2	∞	-	70.1	RUN and FYVE domain-containing protein 2 Mus musculus
Q8R4H2	ARHGEF12	∞	-	172.3	Rho guanine nucleotide exchange factor 12 Mus musculus
Q8R4I7	NETO1	∞	-	60.2	Neuropilin and tolloid-like protein 1 Mus musculus
Q8R516	MIB2	∞	-	106	E3 ubiquitin-protein ligase MIB2 Mus musculus
Q8R5C5	ACTR1B	∞	-	42.3	Beta-centractin Mus musculus
Q8VBY2	CAMKK1	∞	-	55.8	Calcium/calmodulin-dependent protein kinase kinase 1 Mus musculus
Q8VD04	GRIPAP1	∞	-	92.7	GRIP1-associated protein 1 Mus musculus
Q8VDV7	TBC1D19	∞	-	60.4	Rab-GAP TBC domain-containing protein Mus musculus
Q8VEF1	GRAMD1A	∞	-	80.7	Protein Aster-A Mus musculus
Q8VEH2	CIZ1	∞	-	93.6	Matrin-type domain-containing protein Mus musculus
Q8VEH5	EPM2AIP1	∞	-	70.1	EPM2A-interacting protein 1 Mus musculus
Q8VHI6	WASF3	∞	-	55.2	Wiskott-Aldrich syndrome protein family member 3 Mus musculus
Q8VHK9	DHX36	∞	-	113.9	ATP-dependent DNA/RNA helicase DHX36 Mus musculus
Q91V36	NRBP2	∞	-	57.3	Nuclear receptor-binding protein 2 Mus musculus
Q91V51	TTLL1	∞	-	49.1	Probable tubulin polyglutamylase TTLL1 Mus musculus
Q91V93	RHOBTB2	∞	-	82.6	Rho-related BTB domain-containing protein 2 Mus musculus
Q91VW5	GOLGA4	∞	-	257.6	Golgin subfamily A member 4 Mus musculus
Q91W39	NCOA5	∞	-	65.3	Nuclear receptor coactivator 5 Mus musculus
Q91WJ7	SPATS2L	∞	-	61.7	SPATS2-like protein Mus musculus
Q91WL8	WWOX	∞	-	46.5	WW domain-containing oxidoreductase Mus musculus
Q91XU0	WRNIP1	∞	-	71.8	ATPase WRNIP1 Mus musculus
Q91XU3	PIP4K2C	∞	-	47.3	Phosphatidylinositol 5-phosphate 4-kinase type-2 gamma Mus musculus
Q91XX1	PCDHGC3	∞	-	101	Protocadherin gamma C3 Mus musculus
Q91Y09	PCDHAC2	∞	-	109.5	Protocadherin alpha C2 Mus musculus
Q91YD3	DCP1A	∞	-	65.2	mRNA-decapping enzyme 1A Mus musculus
Q91YK0	LRRC49	∞	-	78.9	Leucine-rich repeat-containing protein 49 Mus musculus
Q91YM2	ARHGAP35	∞	-	170.4	Rho GTPase-activating protein 35 Mus musculus
Q91YU6	LZTS2	∞	-	72.6	Leucine zipper putative tumor suppressor 2 Mus musculus
Q91Z49	FYTTD1	∞	-	35.9	UAP56-interacting factor Mus musculus
Q921Q7	RIN1	∞	-	83	Ras and Rab interactor 1 Mus musculus
Q922B6	TRAF7	∞	-	66.5	E3 ubiquitin-protein ligase TRAF7 Mus musculus
Q923G2	POLR2H	∞	-	17.1	DNA-directed RNA polymerases I, II, and III subunit RPABC3 Mus musculus
Q923J1	TRPM7	∞	-	212.4	Transient receptor potential cation channel subfamily M member 7 Mus musculus
Q99JN2	KLHL22	∞	-	71.7	Kelch-like protein 22 Mus musculus
Q99JX7	NXF1	∞	-	70.3	Nuclear RNA export factor 1 Mus musculus
Q99K46	USP11	∞	-	105.4	Ubiquitin carboxyl-terminal hydrolase 11 Mus musculus
Q99KI3	EMC3	∞	-	30	ER membrane protein complex subunit 3 Mus musculus
Q99ME2	WDR6	∞	-	121.9	WD repeat-containing protein 6 Mus musculus
Q99MJ9	DDX50	∞	-	82.2	ATP-dependent RNA helicase DDX50 Mus musculus
Q99MR1	GIGYF1	∞	-	116.2	GRB10-interacting GYF protein 1 Mus musculus
Q99MS8	TPGS1	∞	-	32.6	Tubulin polyglutamylase complex subunit 1 Mus musculus
Q99N57	RAF1	∞	-	72.9	RAF proto-oncogene serine/threonine-protein kinase Mus musculus
Q99NB9	SF3B1	∞	-	145.8	Splicing factor 3B subunit 1 Mus musculus
Q99NH2	PARD3	∞	-	149.1	Partitioning defective 3 homolog Mus musculus
Q99P58	RAB27B	∞	-	24.6	Ras-related protein Rab-27B Mus musculus
Q99PL5	RRBP1	∞	-	172.9	Ribosome-binding protein 1 Mus musculus
Q99PU8	DHX30	∞	-	136.7	ATP-dependent RNA helicase DHX30 Mus musculus
Q9CPW4	ARPC5	∞	-	16.3	Actin-related protein 2/3 complex subunit 5 Mus musculus
Q9CQ73	PKP2	∞	-	88.1	Plakophilin 2 Mus musculus
Q9CQF0	MRPL11	∞	-	20.7	39S ribosomal protein L11, mitochondrial Mus musculus
Q9CRD2	EMC2	∞	-	34.9	ER membrane protein complex subunit 2 Mus musculus
Q9CWN7	CNOT11	∞	-	55	CCR4-NOT transcription complex subunit 11 Mus musculus
Q9CYC6	DCP2	∞	-	48.4	m7GpppN-mRNA hydrolase Mus musculus
Q9CZ62	CEP97	∞	-	94.6	Centrosomal protein of 97 kDa Mus musculus
Q9D067	MDM1	∞	-	79.7	Nuclear protein MDM1 Mus musculus
Q9D0F3	LMAN1	∞	-	57.8	Protein ERGIC-53 Mus musculus
Q9D0L7	ARMC10	∞	-	33.3	Armadillo repeat-containing protein 10 Mus musculus
Q9D1F0	RTL8B	∞	-	13.6	DUF4939 domain-containing protein Mus musculus
Q9D4H4	AMOTL1	∞	-	108	Angiomotin-like protein 1 Mus musculus
Q9D5T0	ATAD1	∞	-	40.7	ATPase family AAA domain-containing protein 1 Mus musculus
Q9D6Z1	NOP56	∞	-	64.5	Nucleolar protein 56 Mus musculus
Q9D832	DNAJB4	∞	-	37.8	DnaJ homolog subfamily B member 4 Mus musculus
Q9DB73	CYB5R1	∞	-	34.1	NADH-cytochrome b5 reductase 1 Mus musculus
Q9DBS2	TPRG1L	∞	-	29.8	Tumor protein p63-regulated gene 1-like protein Mus musculus
Q9DCP2	SLC38A3	∞	-	55.6	Sodium-coupled neutral amino acid transporter 3 Mus musculus
Q9EP71	RAI14	∞	-	108.9	Ankycorbin Mus musculus
Q9EP89	LACTB	∞	-	60.7	Serine beta-lactamase-like protein LACTB, mitochondrial Mus musculus
Q9ERE9	MAPK8IP2	∞	-	89.9	C-Jun-amino-terminal kinase-interacting protein 2 Mus musculus
Q9ERR1	NDEL1	∞	-	38.4	Nuclear distribution protein nudE-like 1 Mus musculus
Q9ERS5	PLEKHA2	∞	-	47.4	Pleckstrin homology domain-containing family A member 2 Mus musculus
Q9ERU9	RANBP2	∞	-	341.1	E3 SUMO-protein ligase RanBP2 Mus musculus
Q9ERV1	MKRN2	∞	-	46.6	Probable E3 ubiquitin-protein ligase makorin-2 Mus musculus
Q9ESN9	MAPK8IP3	∞	-	147.6	C-Jun-amino-terminal kinase-interacting protein 3 Mus musculus
Q9JII1	INPP5E	∞	-	71.9	72 kDa inositol polyphosphate 5-phosphatase Mus musculus
Q9JIK5	DDX21	∞	-	93.6	Nucleolar RNA helicase 2 Mus musculus
Q9JIK9	MRPS34	∞	-	25.8	28S ribosomal protein S34, mitochondrial Mus musculus
Q9JL19	NCOA6	∞	-	219.7	Nuclear receptor coactivator 6 Mus musculus
Q9JMC3	DNAJA4	∞	-	44.9	DnaJ homolog subfamily A member 4 Mus musculus
Q9JMC8	EPB41L4B	∞	-	59.6	Band 4.1-like protein 4B Mus musculus
Q9QUR8	SEMA7A	∞	-	75	Semaphorin-7A Mus musculus
Q9QWI6	SRCIN1	15.57	1.1e-192	134.9	SRC kinase signaling inhibitor 1 Mus musculus
Q9QWV4	MLF1	∞	-	30.4	Myeloid leukemia factor 1 Mus musculus
Q9QX11	CYTH1	∞	-	46.3	Cytohesin-1 Mus musculus
Q9QX47	SON	∞	-	265.7	Protein SON Mus musculus
Q9QXJ4	ARL10	∞	-	27.3	ADP-ribosylation factor-like protein 10 Mus musculus
Q9QXL2	KIF21A	∞	-	186.5	Kinesin-like protein KIF21A Mus musculus
Q9QXL8	NME7	∞	-	44.4	Nucleoside diphosphate kinase 7 Mus musculus
Q9QZB7	ACTR10	∞	-	46.2	Actin-related protein 10 Mus musculus
Q9QZF2	GPC1	∞	-	61.4	Glypican-1 Mus musculus
Q9QZX7	SRR	∞	-	36.4	Serine racemase Mus musculus
Q9R0A0	PEX14	∞	-	41.2	Peroxisomal membrane protein PEX14 Mus musculus
Q9R0A1	CLCN2	∞	-	99.4	Chloride channel protein 2 Mus musculus
Q9R1V4	ADAM11	∞	-	84.1	Disintegrin and metalloproteinase domain-containing protein 11 Mus musculus
Q9WTX2	PRKRA	∞	-	34.4	Interferon-inducible double-stranded RNA-dependent protein kinase activator A Mus musculus
Q9WUN2	TBK1	∞	-	83.4	Serine/threonine-protein kinase TBK1 Mus musculus
Q9WUQ2	PRE	∞	-	45.4	Prolactin regulatory element-binding protein Mus musculus
Q9WVI9	MAPK8IP1	∞	-	77.3	C-Jun-amino-terminal kinase-interacting protein 1 Mus musculus
Q9WVK8	CYP46A1	∞	-	56.8	Cholesterol 24-hydroxylase Mus musculus
Q9WVL0	GSTZ1	∞	-	24.3	Maleylacetoacetate isomerase Mus musculus
Q9WVR4	FXR2	∞	-	73.7	Fragile X mental retardation syndrome-related protein 2 Mus musculus
Q9Z0G0	GIPC1	∞	-	36.1	PDZ domain-containing protein GIPC1 Mus musculus
Q9Z0H3	SMARCB1	∞	-	44.1	SWI/SNF-related matrix-associated actin-dependent regulator of chromatin subfamily B member 1 Mus musculus
Q9Z0J4	NOS	∞	-	160.5	Nitric oxide synthase, brain Mus musculus
Q9Z108	STAU1	∞	-	53.9	Double-stranded RNA-binding protein Staufen homolog 1 Mus musculus
Q9Z1K7	APC2	∞	-	243.1	Adenomatous polyposis coli protein 2 Mus musculus
Q9Z1R2	BAG6	∞	-	121	Large proline-rich protein BAG6 Mus musculus
Q9Z1S3	RASGRP1	∞	-	90.3	RAS guanyl-releasing protein 1 Mus musculus
Q9Z1W9	STK39	∞	-	60.3	STE20/SPS1-related proline-alanine-rich protein kinase Mus musculus
Q9Z2C4	MTMR1	∞	-	75.3	Myotubularin-related protein 1 Mus musculus
Q9Z2D1	MTMR2	∞	-	73.2	Myotubularin-related protein 2 Mus musculus
Q9Z2I8	SUCLG2	∞	-	46.8	Succinate--CoA ligase [GDP-forming] subunit beta, mitochondrial Mus musculus
Q9Z2V6	HDAC5	∞	-	120.9	Histone deacetylase 5 Mus musculus
Q9Z307	KCNJ16	∞	-	48	Inward rectifier potassium channel 16 Mus musculus
Q9Z329	ITPR2	∞	-	307.5	Inositol 1,4,5-trisphosphate receptor type 2 Mus musculus
