# Supplementary material for: Steady-state neuron-predominant LINE-1 encoded ORF1p protein and LINE-1 RNA increase with aging in the mouse and human brain
Source: eLife. 2025 Sep 25;13:RP100687. doi: 10.7554/eLife.100687 (PMC12463392; doi:10.7554/eLife.100687)
Supplement: Supplementary file 3. [file elife-100687-supp3.xlsx]

| <a href="#">PANTHER GO-Slim Biological Process</a>                       | <a href="#">?</a> | <a href="#">#</a>     | <a href="#">#</a>   | <a href="#">expected</a> |
|--------------------------------------------------------------------------|-------------------|-----------------------|---------------------|--------------------------|
| <a href="#">RNA decapping</a>                                            |                   | <a href="#">9</a>     | <a href="#">4</a>   | .17                      |
| <a href="#">cGMP-mediated signaling</a>                                  |                   | <a href="#">11</a>    | <a href="#">4</a>   | .21                      |
| <a href="#">microtubule depolymerization</a>                             |                   | <a href="#">20</a>    | <a href="#">4</a>   | .39                      |
| <a href="#">adherens junction organization</a>                           |                   | <a href="#">26</a>    | <a href="#">5</a>   | .50                      |
| <a href="#">negative regulation of cytoskeleton organization</a>         |                   | <a href="#">47</a>    | <a href="#">8</a>   | .91                      |
| <a href="#">negative regulation of supramolecular fiber organization</a> |                   | <a href="#">45</a>    | <a href="#">7</a>   | .87                      |
| <a href="#">nuclear-transcribed mRNA catabolic process</a>               |                   | <a href="#">55</a>    | <a href="#">7</a>   | 1.06                     |
| <a href="#">negative regulation of organelle organization</a>            |                   | <a href="#">70</a>    | <a href="#">8</a>   | 1.35                     |
| <a href="#">mRNA catabolic process</a>                                   |                   | <a href="#">91</a>    | <a href="#">10</a>  | 1.75                     |
| <a href="#">RNA catabolic process</a>                                    |                   | <a href="#">108</a>   | <a href="#">10</a>  | 2.08                     |
| <a href="#">negative regulation of cellular component organization</a>   |                   | <a href="#">101</a>   | <a href="#">9</a>   | 1.95                     |
| <a href="#">regulation of supramolecular fiber organization</a>          |                   | <a href="#">93</a>    | <a href="#">8</a>   | 1.79                     |
| <a href="#">regulation of translation</a>                                |                   | <a href="#">99</a>    | <a href="#">8</a>   | 1.91                     |
| <a href="#">negative regulation of gene expression</a>                   |                   | <a href="#">157</a>   | <a href="#">12</a>  | 3.03                     |
| <a href="#">posttranscriptional regulation of gene expression</a>        |                   | <a href="#">136</a>   | <a href="#">10</a>  | 2.62                     |
| <a href="#">cell junction organization</a>                               |                   | <a href="#">163</a>   | <a href="#">11</a>  | 3.14                     |
| <a href="#">nucleobase-containing compound catabolic process</a>         |                   | <a href="#">149</a>   | <a href="#">10</a>  | 2.87                     |
| <a href="#">organic cyclic compound catabolic process</a>                |                   | <a href="#">183</a>   | <a href="#">12</a>  | 3.53                     |
| <a href="#">aromatic compound catabolic process</a>                      |                   | <a href="#">170</a>   | <a href="#">11</a>  | 3.28                     |
| <a href="#">neuron projection development</a>                            |                   | <a href="#">217</a>   | <a href="#">14</a>  | 4.18                     |
| <a href="#">cell morphogenesis</a>                                       |                   | <a href="#">237</a>   | <a href="#">15</a>  | 4.57                     |
| <a href="#">actin filament organization</a>                              |                   | <a href="#">198</a>   | <a href="#">12</a>  | 3.82                     |
| <a href="#">neuron development</a>                                       |                   | <a href="#">235</a>   | <a href="#">14</a>  | 4.53                     |
| <a href="#">actin cytoskeleton organization</a>                          |                   | <a href="#">290</a>   | <a href="#">17</a>  | 5.59                     |
| <a href="#">actin filament-based process</a>                             |                   | <a href="#">299</a>   | <a href="#">17</a>  | 5.76                     |
| <a href="#">supramolecular fiber organization</a>                        |                   | <a href="#">320</a>   | <a href="#">18</a>  | 6.17                     |
| <a href="#">synaptic signaling</a>                                       |                   | <a href="#">268</a>   | <a href="#">14</a>  | 5.17                     |
| <a href="#">regulation of cellular component organization</a>            |                   | <a href="#">369</a>   | <a href="#">19</a>  | 7.11                     |
| <a href="#">cytoskeleton organization</a>                                |                   | <a href="#">713</a>   | <a href="#">35</a>  | 13.74                    |
| <a href="#">cell-cell signaling</a>                                      |                   | <a href="#">419</a>   | <a href="#">20</a>  | 8.08                     |
| <a href="#">microtubule-based process</a>                                |                   | <a href="#">481</a>   | <a href="#">22</a>  | 9.27                     |
| <a href="#">nervous system development</a>                               |                   | <a href="#">483</a>   | <a href="#">22</a>  | 9.31                     |
| <a href="#">plasma membrane bounded cell projection organization</a>     |                   | <a href="#">420</a>   | <a href="#">19</a>  | 8.10                     |
| <a href="#">cell projection organization</a>                             |                   | <a href="#">425</a>   | <a href="#">19</a>  | 8.19                     |
| <a href="#">intracellular signal transduction</a>                        |                   | <a href="#">835</a>   | <a href="#">34</a>  | 16.09                    |
| <a href="#">movement of cell or subcellular component</a>                |                   | <a href="#">650</a>   | <a href="#">26</a>  | 12.53                    |
| <a href="#">regulation of cell communication</a>                         |                   | <a href="#">790</a>   | <a href="#">30</a>  | 15.23                    |
| <a href="#">regulation of signaling</a>                                  |                   | <a href="#">791</a>   | <a href="#">30</a>  | 15.25                    |
| <a href="#">cellular component assembly</a>                              |                   | <a href="#">867</a>   | <a href="#">32</a>  | 16.71                    |
| <a href="#">cellular component organization</a>                          |                   | <a href="#">2624</a>  | <a href="#">82</a>  | 50.58                    |
| <a href="#">organelle organization</a>                                   |                   | <a href="#">1998</a>  | <a href="#">61</a>  | 38.51                    |
| <a href="#">cellular component organization or biogenesis</a>            |                   | <a href="#">2745</a>  | <a href="#">82</a>  | 52.91                    |
| <a href="#">cellular process</a>                                         |                   | <a href="#">10403</a> | <a href="#">235</a> | 200.52                   |

| 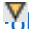 <u>old Enrichmer</u> | <u>+/-</u> | <u>raw P value</u> | <u>FDR</u> |
|--------------------------------------------------------------------------------------------------------|------------|--------------------|------------|
| 23.06                                                                                                  | +          | 7.87E-05           | 1.94E-02   |
| 18.87                                                                                                  | +          | 1.46E-04           | 1.70E-02   |
| 10.38                                                                                                  | +          | 9.93E-04           | 4.90E-02   |
| 9.98                                                                                                   | +          | 2.68E-04           | 2.58E-02   |
| 8.83                                                                                                   | +          | 8.56E-06           | 6.34E-03   |
| 8.07                                                                                                   | +          | 5.29E-05           | 1.68E-02   |
| 6.60                                                                                                   | +          | 1.65E-04           | 1.83E-02   |
| 5.93                                                                                                   | +          | 1.13E-04           | 1.57E-02   |
| 5.70                                                                                                   | +          | 2.18E-05           | 9.70E-03   |
| 4.80                                                                                                   | +          | 8.34E-05           | 1.68E-02   |
| 4.62                                                                                                   | +          | 2.45E-04           | 2.47E-02   |
| 4.46                                                                                                   | +          | 6.68E-04           | 4.01E-02   |
| 4.19                                                                                                   | +          | 9.77E-04           | 5.05E-02   |
| 3.97                                                                                                   | +          | 9.42E-05           | 1.49E-02   |
| 3.81                                                                                                   | +          | 4.75E-04           | 3.29E-02   |
| 3.50                                                                                                   | +          | 4.97E-04           | 3.34E-02   |
| 3.48                                                                                                   | +          | 9.21E-04           | 4.99E-02   |
| 3.40                                                                                                   | +          | 3.57E-04           | 2.83E-02   |
| 3.36                                                                                                   | +          | 6.91E-04           | 4.04E-02   |
| 3.35                                                                                                   | +          | 1.39E-04           | 1.71E-02   |
| 3.28                                                                                                   | +          | 9.90E-05           | 1.46E-02   |
| 3.14                                                                                                   | +          | 6.93E-04           | 3.94E-02   |
| 3.09                                                                                                   | +          | 3.01E-04           | 2.67E-02   |
| 3.04                                                                                                   | +          | 8.47E-05           | 1.57E-02   |
| 2.95                                                                                                   | +          | 1.20E-04           | 1.57E-02   |
| 2.92                                                                                                   | +          | 8.69E-05           | 1.48E-02   |
| 2.71                                                                                                   | +          | 1.03E-03           | 4.85E-02   |
| 2.67                                                                                                   | +          | 1.67E-04           | 1.76E-02   |
| 2.55                                                                                                   | +          | 1.41E-06           | 3.14E-03   |
| 2.48                                                                                                   | +          | 2.92E-04           | 2.70E-02   |
| 2.37                                                                                                   | +          | 3.21E-04           | 2.74E-02   |
| 2.36                                                                                                   | +          | 3.33E-04           | 2.74E-02   |
| 2.35                                                                                                   | +          | 9.74E-04           | 5.15E-02   |
| 2.32                                                                                                   | +          | 1.06E-03           | 4.92E-02   |
| 2.11                                                                                                   | +          | 6.37E-05           | 1.77E-02   |
| 2.08                                                                                                   | +          | 7.54E-04           | 4.19E-02   |
| 1.97                                                                                                   | +          | 5.80E-04           | 3.78E-02   |
| 1.97                                                                                                   | +          | 5.88E-04           | 3.73E-02   |
| 1.91                                                                                                   | +          | 6.32E-04           | 3.90E-02   |
| 1.62                                                                                                   | +          | 1.53E-05           | 8.51E-03   |
| 1.58                                                                                                   | +          | 4.58E-04           | 3.39E-02   |
| 1.55                                                                                                   | +          | 8.15E-05           | 1.81E-02   |
| 1.17                                                                                                   | +          | 9.86E-04           | 4.97E-02   |
