# Supplementary material for: Steady-state neuron-predominant LINE-1 encoded ORF1p protein and LINE-1 RNA increase with aging in the mouse and human brain
Source: eLife. 2025 Sep 25;13:RP100687. doi: 10.7554/eLife.100687 (PMC12463392; doi:10.7554/eLife.100687)
Supplement: Supplementary file 4. [file elife-100687-supp4.xlsx]

| Gene ref                   | Gene name | Condition |
|----------------------------|-----------|-----------|
| <a href="#">P11260</a>     | L1RE1     | known     |
| <a href="#">Q6ZQ58</a>     | LARP1     | known     |
| <a href="#">Q64012</a>     | RALY      | known     |
| <a href="#">Q80ZM5</a>     | H1FX      | known     |
| <a href="#">Q8CJ67</a>     | STAU2     | known     |
| <a href="#">Q9JIK5</a>     | DDX21     | known     |
| <a href="#">F8VPP8</a>     | ZC3H7B    | known     |
| <a href="#">O70305</a>     | ATXN2     | known     |
| <a href="#">O88532</a>     | ZFR       | known     |
| <a href="#">P05784</a>     | KRT18     | known     |
| <a href="#">P29788</a>     | VTN       | known     |
| <a href="#">P97473</a>     | TARBP2    | known     |
| <a href="#">Q00623</a>     | APOA1     | known     |
| <a href="#">Q01405</a>     | SEC23A    | known     |
| <a href="#">Q3U564</a>     | DCP1B     | known     |
| <a href="#">Q3UJB9</a>     | EDC4      | known     |
| <a href="#">Q64337</a>     | SQSTM1    | known     |
| <a href="#">Q70FJ1</a>     | AKAP9     | known     |
| <a href="#">Q80TV8</a>     | CLASP1    | known     |
| <a href="#">Q8BH15</a>     | CNOT10    | known     |
| <a href="#">Q8BQZ5</a>     | CPSF4     | known     |
| <a href="#">Q8C080</a>     | SNX16     | known     |
| <a href="#">Q8C170</a>     | MYO9A     | known     |
| <a href="#">Q8K224</a>     | NAT10     | known     |
| <a href="#">Q8K2D3</a>     | EDC3      | known     |
| <a href="#">Q8VEF1</a>     | GRAMD1A   | known     |
| <a href="#">Q8VEH2</a>     | CIZ1      | known     |
| <a href="#">Q8VHK9</a>     | DHX36     | known     |
| <a href="#">Q91WJ7</a>     | SPATS2L   | known     |
| <a href="#">Q923J1</a>     | TRPM7     | known     |
| <a href="#">Q99MR1</a>     | GIGYF1    | known     |
| <a href="#">Q99NB9</a>     | SF3B1     | known     |
| <a href="#">Q99PU8</a>     | DHX30     | known     |
| <a href="#">Q9CWN7</a>     | CNOT11    | known     |
| <a href="#">Q9D6Z1</a>     | NOP56     | known     |
| <a href="#">Q9WTX2</a>     | PRKRA     | known     |
| <a href="#">Q9WVR4</a>     | FXR2      | known     |
| <a href="#">Q9Z108</a>     | STAU1     | known     |
| <a href="#">A0A2I3BQ48</a> | DGKH      | not known |

|                            |           |           |
|----------------------------|-----------|-----------|
| <a href="#">A0A571BF58</a> | NEB       | not known |
| <a href="#">A0A5F8MPP0</a> | PLEKHG1   | not known |
| <a href="#">A2A6T1</a>     | CDR2L     | not known |
| <a href="#">A2AAX3</a>     | KLHL15    | not known |
| <a href="#">A2AF47</a>     | DOCK11    | not known |
| <a href="#">A2AHC3</a>     | CAMSAP1   | not known |
| <a href="#">A2AI08</a>     | TPRN      | not known |
| <a href="#">A2AJK6</a>     | CHD7      | not known |
| <a href="#">A2ALK8</a>     | PTPN3     | not known |
| <a href="#">A2ALS5</a>     | RAP1GAP   | not known |
| <a href="#">A2APX8</a>     | SCN1A     | not known |
| <a href="#">A2AQ25</a>     | SKT       | not known |
| <a href="#">A2ASZ8</a>     | SLC25A25  | not known |
| <a href="#">A2AV25</a>     | FIBCD1    | not known |
| <a href="#">A2BH40</a>     | ARID1A    | not known |
| <a href="#">B1AWC9</a>     | PDE4B     | not known |
| <a href="#">B2RR83</a>     | YTHDC2    | not known |
| <a href="#">D3YXK0</a>     | JAKMIP2   | not known |
| <a href="#">D3YZG8</a>     | MTHFD2L   | not known |
| <a href="#">E9PUQ8</a>     | DGKD      | not known |
| <a href="#">E9PZP8</a>     | HERC1     | not known |
| <a href="#">E9Q0S6</a>     | TNS1      | not known |
| <a href="#">E9Q1M1</a>     | PDZD2     | not known |
| <a href="#">E9Q236</a>     | ABCC4     | not known |
| <a href="#">E9Q401</a>     | RYR2      | not known |
| <a href="#">E9Q4N7</a>     | ARID1B    | not known |
| <a href="#">E9Q6P5</a>     | TTC7B     | not known |
| <a href="#">E9Q6R7</a>     | UTRN      | not known |
| <a href="#">E9Q8I9</a>     | FRY       | not known |
| <a href="#">E9Q9B3</a>     | SPRYD3    | not known |
| <a href="#">E9Q9B7</a>     | KIDINS220 | not known |
| <a href="#">E9Q9K8</a>     | AKAP6     | not known |
| <a href="#">E9Q9R9</a>     | DLG5      | not known |
| <a href="#">F2Z3U3</a>     | RAPH1     | not known |
| <a href="#">F7BAB2</a>     | TMEM132B  | not known |
| <a href="#">F8VPN4</a>     | AGL       | not known |
| <a href="#">F8VQB6</a>     | MYO1      | not known |
| <a href="#">F8VQK3</a>     | GUCY1A2   | not known |
| <a href="#">G3X9I7</a>     | ZC3H12B   | not known |
| <a href="#">J9S314</a>     | TRPM3     | not known |
| <a href="#">O08576</a>     | RUNDC3A   | not known |
| <a href="#">O08672</a>     | KIFC2     | not known |
| <a href="#">O09161</a>     | CASQ2     | not known |
| <a href="#">O35066</a>     | KIF3C     | not known |
| <a href="#">O35099</a>     | MAP3K5    | not known |

|                        |         |           |
|------------------------|---------|-----------|
| <a href="#">O35231</a> | KIFC3   | not known |
| <a href="#">O35643</a> | AP1B1   | not known |
| <a href="#">O35874</a> | SLC1A4  | not known |
| <a href="#">O54781</a> | SRPK2   | not known |
| <a href="#">O54828</a> | RGS9    | not known |
| <a href="#">O54865</a> | GUCY1B3 | not known |
| <a href="#">O70161</a> | PIP5K1C | not known |
| <a href="#">O70378</a> | EMC8    | not known |
| <a href="#">O70405</a> | ULK1    | not known |
| <a href="#">O88196</a> | TTC3    | not known |
| <a href="#">O88384</a> | VTI1B   | not known |
| <a href="#">O88441</a> | MTX2    | not known |
| <a href="#">O88951</a> | LIN7B   | not known |
| <a href="#">O89084</a> | PDE4A   | not known |
| <a href="#">P08775</a> | POLR2A  | not known |
| <a href="#">P0C673</a> | IGSF11  | not known |
| <a href="#">P11531</a> | DMD     | not known |
| <a href="#">P11679</a> | KRT8    | not known |
| <a href="#">P16283</a> | SLC4A3  | not known |
| <a href="#">P28028</a> | BRAF    | not known |
| <a href="#">P28653</a> | BGN     | not known |
| <a href="#">P28654</a> | DCN     | not known |
| <a href="#">P28741</a> | KIF3A   | not known |
| <a href="#">P35585</a> | AP1M1   | not known |
| <a href="#">P37040</a> | POR     | not known |
| <a href="#">P39087</a> | GRIK2   | not known |
| <a href="#">P43024</a> | COX6A1  | not known |
| <a href="#">P45481</a> | CREBBP  | not known |
| <a href="#">P48725</a> | PCNT    | not known |
| <a href="#">P52332</a> | JAK1    | not known |
| <a href="#">P54818</a> | GALC    | not known |
| <a href="#">P55284</a> | CDH5    | not known |
| <a href="#">P58390</a> | KCNN2   | not known |
| <a href="#">P58391</a> | KCNN3   | not known |
| <a href="#">P59759</a> | MKL2    | not known |
| <a href="#">P60191</a> | RIMS4   | not known |
| <a href="#">P62046</a> | LRCH1   | not known |
| <a href="#">P62880</a> | GNB2    | not known |
| <a href="#">P70188</a> | KIFAP3  | not known |
| <a href="#">P70248</a> | MYO1F   | not known |
| <a href="#">P70257</a> | NFIX    | not known |
| <a href="#">P70271</a> | PDLIM4  | not known |
| <a href="#">P70297</a> | STAM    | not known |
| <a href="#">P80560</a> | PTPRN2  | not known |
| <a href="#">P97291</a> | CDH8    | not known |

|                        |               |           |
|------------------------|---------------|-----------|
| <a href="#">P97412</a> | LYST          | not known |
| <a href="#">P97467</a> | PAM           | not known |
| <a href="#">P97760</a> | POLR2C        | not known |
| <a href="#">P98084</a> | APBA2         | not known |
| <a href="#">Q03137</a> | EPHA4         | not known |
| <a href="#">Q03173</a> | ENAH          | not known |
| <a href="#">Q03717</a> | KCNB          | not known |
| <a href="#">Q04735</a> | CDK16         | not known |
| <a href="#">Q04859</a> | MAK           | not known |
| <a href="#">Q05860</a> | FMN1          | not known |
| <a href="#">Q0VAV2</a> | EXPH          | not known |
| <a href="#">Q0VGU4</a> | VGF           | not known |
| <a href="#">Q0VGY8</a> | TANC1         | not known |
| <a href="#">Q14BI2</a> | GRM2          | not known |
| <a href="#">Q2KN98</a> | SPECC1L       | not known |
| <a href="#">Q2PZL6</a> | FAT4          | not known |
| <a href="#">Q3TDQ1</a> | STT3B         | not known |
| <a href="#">Q3TE80</a> | 2410002F23RIK | not known |
| <a href="#">Q3TL44</a> | NLRX1         | not known |
| <a href="#">Q3TLI0</a> | TRAPPC10      | not known |
| <a href="#">Q3TRM4</a> | PNPLA6        | not known |
| <a href="#">Q3TRR0</a> | MAP9          | not known |
| <a href="#">Q3TVI8</a> | PBXIP1        | not known |
| <a href="#">Q3TY86</a> | AIFM3         | not known |
| <a href="#">Q3U0M1</a> | TRAPPC9       | not known |
| <a href="#">Q3U5C7</a> | PRICKLE1      | not known |
| <a href="#">Q3UE31</a> | MTUS2         | not known |
| <a href="#">Q3UHC7</a> | DAB2IP        | not known |
| <a href="#">Q3UHD1</a> | BAI1          | not known |
| <a href="#">Q3UHF7</a> | HIVEP2        | not known |
| <a href="#">Q3UHH1</a> | ZSWIM8        | not known |
| <a href="#">Q3UHI0</a> | CCSER2        | not known |
| <a href="#">Q3UHU5</a> | SOGA2         | not known |
| <a href="#">Q3ULB5</a> | PAK6          | not known |
| <a href="#">Q3ULW6</a> | CCDC33        | not known |
| <a href="#">Q3UMT1</a> | PPP1R12C      | not known |
| <a href="#">Q3UNH4</a> | GPRIN1        | not known |
| <a href="#">Q3URD3</a> | SLMAP         | not known |
| <a href="#">Q3USH1</a> | FAM196A       | not known |
| <a href="#">Q3UTQ8</a> | CDKL5         | not known |
| <a href="#">Q3UTZ3</a> | MAP11         | not known |
| <a href="#">Q3UUF8</a> | ANKRD34B      | not known |
| <a href="#">Q3UV70</a> | PDP1          | not known |
| <a href="#">Q3UVC0</a> | KSR2          | not known |
| <a href="#">Q3UVX5</a> | GRM5          | not known |

|                        |          |           |
|------------------------|----------|-----------|
| <a href="#">Q3V1U8</a> | ELMOD1   | not known |
| <a href="#">Q499E5</a> | STOX2    | not known |
| <a href="#">Q4QQM5</a> | FAM73A   | not known |
| <a href="#">Q4U2R1</a> | HERC2    | not known |
| <a href="#">Q4VAC9</a> | PLEKHG3  | not known |
| <a href="#">Q505D1</a> | ANKRD28  | not known |
| <a href="#">Q571I4</a> | SGK223   | not known |
| <a href="#">Q5DTY9</a> | KCTD16   | not known |
| <a href="#">Q5DU14</a> | MYO10    | not known |
| <a href="#">Q5HZI2</a> | C2CD4C   | not known |
| <a href="#">Q5NBX1</a> | COBL     | not known |
| <a href="#">Q5RJH3</a> | CDH12    | not known |
| <a href="#">Q5RJH6</a> | SMG7     | not known |
| <a href="#">Q5SUA5</a> | MYO1G    | not known |
| <a href="#">Q5SW75</a> | SSH2     | not known |
| <a href="#">Q60737</a> | CSNK2A1  | not known |
| <a href="#">Q60770</a> | STXBP3   | not known |
| <a href="#">Q60803</a> | TRAF3    | not known |
| <a href="#">Q60841</a> | RELN     | not known |
| <a href="#">Q60900</a> | ELAVL3   | not known |
| <a href="#">Q60996</a> | PPP2R5C  | not known |
| <a href="#">Q61033</a> | TMPO     | not known |
| <a href="#">Q61315</a> | APC      | not known |
| <a href="#">Q61334</a> | BCAP29   | not known |
| <a href="#">Q61464</a> | ZNF638   | not known |
| <a href="#">Q61771</a> | KIF3B    | not known |
| <a href="#">Q62095</a> | DDX3Y    | not known |
| <a href="#">Q62120</a> | JAK2     | not known |
| <a href="#">Q62407</a> | SPEG     | not known |
| <a href="#">Q64096</a> | MCF2L    | not known |
| <a href="#">Q640Q5</a> | PAN3     | not known |
| <a href="#">Q641K5</a> | NUAK1    | not known |
| <a href="#">Q64727</a> | VCL      | not known |
| <a href="#">Q65CL1</a> | CTNNA3   | not known |
| <a href="#">Q67BT3</a> | SLC13A5  | not known |
| <a href="#">Q68FF0</a> | KIAA1841 | not known |
| <a href="#">Q69Z99</a> | ZNF512   | not known |
| <a href="#">Q69ZS8</a> | KAZN     | not known |
| <a href="#">Q6DFV5</a> | HELZ     | not known |
| <a href="#">Q6DICO</a> | SMARCA2  | not known |
| <a href="#">Q6GQW0</a> | BTBD11   | not known |
| <a href="#">Q6IMP4</a> | PANX2    | not known |
| <a href="#">Q6NXI6</a> | RPRD2    | not known |
| <a href="#">Q6NXJ0</a> | WWC2     | not known |
| <a href="#">Q6P6I6</a> | POLR2M   | not known |

|                        |          |           |
|------------------------|----------|-----------|
| <a href="#">Q6PAM0</a> | PRKAB2   | not known |
| <a href="#">Q6PCX9</a> | TRIM37   | not known |
| <a href="#">Q6PCZ4</a> | MAGEE1   | not known |
| <a href="#">Q6PD28</a> | PPP2R5B  | not known |
| <a href="#">Q6PDG5</a> | SMARCC2  | not known |
| <a href="#">Q6PEE2</a> | CTIF     | not known |
| <a href="#">Q6PEM6</a> | GRAMD3   | not known |
| <a href="#">Q6PHZ8</a> | KCNIP4   | not known |
| <a href="#">Q6RHR9</a> | MAGI1    | not known |
| <a href="#">Q6RI63</a> | FAM120B  | not known |
| <a href="#">Q6Y7W8</a> | GIGYF2   | not known |
| <a href="#">Q6ZPQ6</a> | PITPNM2  | not known |
| <a href="#">Q6ZPY2</a> | SMG5     | not known |
| <a href="#">Q6ZQ29</a> | TAOK2    | not known |
| <a href="#">Q70IV5</a> | SYNM     | not known |
| <a href="#">Q76I79</a> | SSH1     | not known |
| <a href="#">Q7TME0</a> | PLPPR4   | not known |
| <a href="#">Q7TNM2</a> | TRIM46   | not known |
| <a href="#">Q7TPV4</a> | MYBBP1A  | not known |
| <a href="#">Q7TQ95</a> | LNP      | not known |
| <a href="#">Q7TQF2</a> | FBXO10   | not known |
| <a href="#">Q7TT37</a> | IKBKAP   | not known |
| <a href="#">Q7TT50</a> | CDC42BPB | not known |
| <a href="#">Q80TF3</a> | PCDH19   | not known |
| <a href="#">Q80TL0</a> | PPM1E    | not known |
| <a href="#">Q80TM6</a> | R3HDM2   | not known |
| <a href="#">Q80TM9</a> | NISCH    | not known |
| <a href="#">Q80TN7</a> | NAV3     | not known |
| <a href="#">Q80TT8</a> | CUL9     | not known |
| <a href="#">Q80TZ9</a> | RERE     | not known |
| <a href="#">Q80U04</a> | PJA2     | not known |
| <a href="#">Q80U19</a> | DAAM2    | not known |
| <a href="#">Q80U59</a> | KIAA0232 | not known |
| <a href="#">Q80UK0</a> | SESTD1   | not known |
| <a href="#">Q80V91</a> | DTX3     | not known |
| <a href="#">Q80W47</a> | WIPI2    | not known |
| <a href="#">Q80WG5</a> | LRRC8A   | not known |
| <a href="#">Q80X66</a> | BTBD10   | not known |
| <a href="#">Q80Y83</a> | DIXDC1   | not known |
| <a href="#">Q80YA3</a> | DDHD1    | not known |
| <a href="#">Q80YE7</a> | DAPK1    | not known |
| <a href="#">Q80YF9</a> | ARHGAP33 | not known |
| <a href="#">Q80YT7</a> | PDE4DIP  | not known |
| <a href="#">Q80ZJ7</a> | SNX32    | not known |
| <a href="#">Q80ZX0</a> | SEC24B   | not known |

|                        |          |           |
|------------------------|----------|-----------|
| <a href="#">Q8BG89</a> | ZNF365   | not known |
| <a href="#">Q8BI72</a> | CDKN2AIP | not known |
| <a href="#">Q8BIE6</a> | FRMD4A   | not known |
| <a href="#">Q8BJA3</a> | HMBOX1   | not known |
| <a href="#">Q8BK72</a> | MRPS27   | not known |
| <a href="#">Q8BL06</a> | USP54    | not known |
| <a href="#">Q8BL66</a> | EEA1     | not known |
| <a href="#">Q8BLN6</a> | UNC80    | not known |
| <a href="#">Q8BM13</a> | OLFM2    | not known |
| <a href="#">Q8BM92</a> | CDH7     | not known |
| <a href="#">Q8BMB3</a> | EIF4E2   | not known |
| <a href="#">Q8BML1</a> | MICAL2   | not known |
| <a href="#">Q8BNA6</a> | FAT3     | not known |
| <a href="#">Q8BNN1</a> | SPATA2L  | not known |
| <a href="#">Q8BPU7</a> | ELMO1    | not known |
| <a href="#">Q8BQM8</a> | EML5     | not known |
| <a href="#">Q8BRK8</a> | PRKAA2   | not known |
| <a href="#">Q8BSL7</a> | ARF2     | not known |
| <a href="#">Q8BTY2</a> | SLC4A7   | not known |
| <a href="#">Q8BUM6</a> | FAM163B  | not known |
| <a href="#">Q8BW41</a> | POMGNT2  | not known |
| <a href="#">Q8BX02</a> | KANK2    | not known |
| <a href="#">Q8BXL9</a> | IFFO1    | not known |
| <a href="#">Q8BZ05</a> | ARAP2    | not known |
| <a href="#">Q8BZ60</a> | STON2    | not known |
| <a href="#">Q8BZI0</a> | AFAP1L1  | not known |
| <a href="#">Q8BZZ3</a> | WWP1     | not known |
| <a href="#">Q8C008</a> | DZANK1   | not known |
| <a href="#">Q8C079</a> | STRIP1   | not known |
| <a href="#">Q8C0D9</a> | CEP68    | not known |
| <a href="#">Q8C0L0</a> | TMX4     | not known |
| <a href="#">Q8C1B1</a> | CAMSAP2  | not known |
| <a href="#">Q8C5Q4</a> | GRSF1    | not known |
| <a href="#">Q8C753</a> | KIAA0556 | not known |
| <a href="#">Q8C863</a> | ITCH     | not known |
| <a href="#">Q8C9H6</a> | STRIP2   | not known |
| <a href="#">Q8CA95</a> | PDE10A   | not known |
| <a href="#">Q8CCJ4</a> | AMER2    | not known |
| <a href="#">Q8CCN5</a> | BCAS3    | not known |
| <a href="#">Q8CDG3</a> | VCPIP1   | not known |
| <a href="#">Q8CFI7</a> | POL2RB   | not known |
| <a href="#">Q8CGM1</a> | BAI2     | not known |
| <a href="#">Q8CGU1</a> | CALCOCO1 | not known |
| <a href="#">Q8CH09</a> | SUGP2    | not known |
| <a href="#">Q8CI59</a> | STEAP3   | not known |

|                        |          |           |
|------------------------|----------|-----------|
| <a href="#">Q8CI78</a> | RMND1    | not known |
| <a href="#">Q8CIW6</a> | SLC26A6  | not known |
| <a href="#">Q8JZR6</a> | SLC4A8   | not known |
| <a href="#">Q8JZW5</a> | SH2D5    | not known |
| <a href="#">Q8K004</a> | SPATA2   | not known |
| <a href="#">Q8K1S6</a> | SPIRE2   | not known |
| <a href="#">Q8K2J0</a> | PLCD3    | not known |
| <a href="#">Q8K2Y0</a> | RNF219   | not known |
| <a href="#">Q8K3B1</a> | FBXO45   | not known |
| <a href="#">Q8K3E5</a> | AHI1     | not known |
| <a href="#">Q8K3I4</a> | MYRIP    | not known |
| <a href="#">Q8K4P0</a> | WDR33    | not known |
| <a href="#">Q8K4P8</a> | HECW1    | not known |
| <a href="#">Q8R0G9</a> | NUP133   | not known |
| <a href="#">Q8R1G6</a> | PDLIM2   | not known |
| <a href="#">Q8R4C2</a> | RUFY2    | not known |
| <a href="#">Q8R4H2</a> | ARHGEF12 | not known |
| <a href="#">Q8R4I7</a> | NETO1    | not known |
| <a href="#">Q8R516</a> | MIB2     | not known |
| <a href="#">Q8R5C5</a> | ACTR1B   | not known |
| <a href="#">Q8VBY2</a> | CAMKK1   | not known |
| <a href="#">Q8VD04</a> | GRIPAP1  | not known |
| <a href="#">Q8VDV7</a> | TBC1D19  | not known |
| <a href="#">Q8VEH5</a> | EPM2AIP1 | not known |
| <a href="#">Q8VHI6</a> | WASF3    | not known |
| <a href="#">Q91V36</a> | NRBP2    | not known |
| <a href="#">Q91V51</a> | TTLL1    | not known |
| <a href="#">Q91V93</a> | RHOBTB2  | not known |
| <a href="#">Q91VW5</a> | GOLGA4   | not known |
| <a href="#">Q91W39</a> | NCOA5    | not known |
| <a href="#">Q91WL8</a> | WWOX     | not known |
| <a href="#">Q91XU0</a> | WRNIP1   | not known |
| <a href="#">Q91XU3</a> | PIP4K2C  | not known |
| <a href="#">Q91XX1</a> | PCDHGC3  | not known |
| <a href="#">Q91Y09</a> | PCDHAC2  | not known |
| <a href="#">Q91YD3</a> | DCP1A    | not known |
| <a href="#">Q91YK0</a> | LRRC49   | not known |
| <a href="#">Q91YM2</a> | ARHGAP35 | not known |
| <a href="#">Q91YU6</a> | LZTS2    | not known |
| <a href="#">Q91Z49</a> | FYTTD1   | not known |
| <a href="#">Q921Q7</a> | RIN1     | not known |
| <a href="#">Q922B6</a> | TRAF7    | not known |
| <a href="#">Q923G2</a> | POLR2H   | not known |
| <a href="#">Q99JN2</a> | KLHL22   | not known |
| <a href="#">Q99JX7</a> | NXF1     | not known |

|                        |          |           |
|------------------------|----------|-----------|
| <a href="#">Q99K46</a> | USP11    | not known |
| <a href="#">Q99KI3</a> | EMC3     | not known |
| <a href="#">Q99ME2</a> | WDR6     | not known |
| <a href="#">Q99MJ9</a> | DDX50    | not known |
| <a href="#">Q99MS8</a> | TPGS1    | not known |
| <a href="#">Q99N57</a> | RAF1     | not known |
| <a href="#">Q99NH2</a> | PARD3    | not known |
| <a href="#">Q99P58</a> | RAB27B   | not known |
| <a href="#">Q99PL5</a> | RRBP1    | not known |
| <a href="#">Q9CPW4</a> | ARPC5    | not known |
| <a href="#">Q9CQ73</a> | PKP2     | not known |
| <a href="#">Q9CQF0</a> | MRPL11   | not known |
| <a href="#">Q9CRD2</a> | EMC2     | not known |
| <a href="#">Q9CYC6</a> | DCP2     | not known |
| <a href="#">Q9CZ62</a> | CEP97    | not known |
| <a href="#">Q9D067</a> | MDM1     | not known |
| <a href="#">Q9D0F3</a> | LMAN1    | not known |
| <a href="#">Q9D0L7</a> | ARMC10   | not known |
| <a href="#">Q9D1F0</a> | RTL8B    | not known |
| <a href="#">Q9D4H4</a> | AMOTL1   | not known |
| <a href="#">Q9D5T0</a> | ATAD1    | not known |
| <a href="#">Q9D832</a> | DNAJB4   | not known |
| <a href="#">Q9DB73</a> | CYB5R1   | not known |
| <a href="#">Q9DBS2</a> | TPRG1L   | not known |
| <a href="#">Q9DCP2</a> | SLC38A3  | not known |
| <a href="#">Q9EP71</a> | RAI14    | not known |
| <a href="#">Q9EP89</a> | LACTB    | not known |
| <a href="#">Q9ERE9</a> | MAPK8IP2 | not known |
| <a href="#">Q9ERR1</a> | NDEL1    | not known |
| <a href="#">Q9ERS5</a> | PLEKHA2  | not known |
| <a href="#">Q9ERU9</a> | RANBP2   | not known |
| <a href="#">Q9ERV1</a> | MKRN2    | not known |
| <a href="#">Q9ESN9</a> | MAPK8IP3 | not known |
| <a href="#">Q9JII1</a> | INPP5E   | not known |
| <a href="#">Q9JIK9</a> | MRPS34   | not known |
| <a href="#">Q9JL19</a> | NCOA6    | not known |
| <a href="#">Q9JMC3</a> | DNAJA4   | not known |
| <a href="#">Q9JMC8</a> | EPB41L4B | not known |
| <a href="#">Q9QUR8</a> | SEMA7A   | not known |
| <a href="#">Q9QWI6</a> | SRCIN1   | not known |
| <a href="#">Q9QWV4</a> | MLF1     | not known |
| <a href="#">Q9QX11</a> | CYTH1    | not known |
| <a href="#">Q9QX47</a> | SON      | not known |
| <a href="#">Q9QXJ4</a> | ARL10    | not known |
| <a href="#">Q9QXL2</a> | KIF21A   | not known |

|                        |          |           |
|------------------------|----------|-----------|
| <a href="#">Q9QXL8</a> | NME7     | not known |
| <a href="#">Q9QZB7</a> | ACTR10   | not known |
| <a href="#">Q9QZF2</a> | GPC1     | not known |
| <a href="#">Q9QZX7</a> | SRR      | not known |
| <a href="#">Q9R0A0</a> | PEX14    | not known |
| <a href="#">Q9R0A1</a> | CLCN2    | not known |
| <a href="#">Q9R1V4</a> | ADAM11   | not known |
| <a href="#">Q9WUN2</a> | TBK1     | not known |
| <a href="#">Q9WUQ2</a> | PRE      | not known |
| <a href="#">Q9WVI9</a> | MAPK8IP1 | not known |
| <a href="#">Q9WVK8</a> | CYP46A1  | not known |
| <a href="#">Q9WVL0</a> | GSTZ1    | not known |
| <a href="#">Q9Z0G0</a> | GIPC1    | not known |
| <a href="#">Q9Z0H3</a> | SMARCB1  | not known |
| <a href="#">Q9Z0J4</a> | NOS      | not known |
| <a href="#">Q9Z1K7</a> | APC2     | not known |
| <a href="#">Q9Z1R2</a> | BAG6     | not known |
| <a href="#">Q9Z1S3</a> | RASGRP1  | not known |
| <a href="#">Q9Z1W9</a> | STK39    | not known |
| <a href="#">Q9Z2C4</a> | MTMR1    | not known |
| <a href="#">Q9Z2D1</a> | MTMR2    | not known |
| <a href="#">Q9Z2I8</a> | SUCLG2   | not known |
| <a href="#">Q9Z2V6</a> | HDAC5    | not known |
| <a href="#">Q9Z307</a> | KCNJ16   | not known |
| <a href="#">Q9Z329</a> | ITPR2    | not known |

## Description

LINE-1 retrotransposable element ORF1 protein *Mus musculus*  
La-related protein 1 *Mus musculus*  
RNA-binding protein Raly *Mus musculus*  
H15 domain-containing protein *Mus musculus*  
Double-stranded RNA-binding protein Staufen homolog 2 *Mus musculus*  
Nucleolar RNA helicase 2 *Mus musculus*  
Zinc finger CCCH type-containing 7B *Mus musculus*  
Ataxin-2 *Mus musculus*  
Zinc finger RNA-binding protein *Mus musculus*  
Keratin, type I cytoskeletal 18 *Mus musculus*  
Vitronectin *Mus musculus*  
RISC-loading complex subunit TARBP2 *Mus musculus*  
Apolipoprotein A-I *Mus musculus*  
Protein transport protein Sec23A *Mus musculus*  
mRNA-decapping enzyme 1B *Mus musculus*  
Enhancer of mRNA-decapping protein 4 *Mus musculus*  
Sequestosome-1 *Mus musculus*  
A-kinase anchor protein 9 *Mus musculus*  
CLIP-associating protein 1 *Mus musculus*  
CCR4-NOT transcription complex subunit 10 *Mus musculus*  
Cleavage and polyadenylation specificity factor subunit 4 *Mus musculus*  
Sorting nexin-16 *Mus musculus*  
Unconventional myosin-IXa *Mus musculus*  
RNA cytidine acetyltransferase *Mus musculus*  
Enhancer of mRNA-decapping protein 3 *Mus musculus*  
Protein Aster-A *Mus musculus*  
Matrin-type domain-containing protein *Mus musculus*  
ATP-dependent DNA/RNA helicase DHX36 *Mus musculus*  
SPATS2-like protein *Mus musculus*  
Transient receptor potential cation channel subfamily M member 7 *Mus musculus*  
GRB10-interacting GYF protein 1 *Mus musculus*  
Splicing factor 3B subunit 1 *Mus musculus*  
ATP-dependent RNA helicase DHX30 *Mus musculus*  
CCR4-NOT transcription complex subunit 11 *Mus musculus*  
Nucleolar protein 56 *Mus musculus*  
Interferon-inducible double-stranded RNA-dependent protein kinase activator  
Fragile X mental retardation syndrome-related protein 2 *Mus musculus*  
Double-stranded RNA-binding protein Staufen homolog 1 *Mus musculus*  
Diacylglycerol kinase *Mus musculus*

SH3 domain-containing protein *Mus musculus*  
Pleckstrin homology domain containing, family G (with RhoGef domain) memk  
Cerebellar degeneration-related protein 2-like *Mus musculus*  
Kelch-like protein 15 *Mus musculus*  
Dedicator of cytokinesis protein 11 *Mus musculus*  
Calmodulin-regulated spectrin-associated protein 1 *Mus musculus*  
Taperin *Mus musculus*  
Chromodomain-helicase-DNA-binding protein 7 *Mus musculus*  
Tyrosine-protein phosphatase non-receptor type 3 *Mus musculus*  
Rap1 GTPase-activating protein 1 *Mus musculus*  
Sodium channel protein type 1 subunit alpha *Mus musculus*  
Sickle tail protein *Mus musculus*  
Calcium-binding mitochondrial carrier protein SCaMC-2 *Mus musculus*  
Fibrinogen C domain-containing protein 1 *Mus musculus*  
AT-rich interactive domain-containing protein 1A *Mus musculus*  
Phosphodiesterase *Mus musculus*  
3'-5' RNA helicase YTHDC2 *Mus musculus*  
Janus kinase and microtubule-interacting protein 2 *Mus musculus*  
Probable bifunctional methylenetetrahydrofolate dehydrogenase/cyclohydrolase  
Diacylglycerol kinase *Mus musculus*  
HECT and RLD domain-containing E3 ubiquitin protein ligase family member 1  
Tensin 1 *Mus musculus*  
PDZ domain-containing 2 *Mus musculus*  
ATP-binding cassette, sub-family C (CFTR/MRP), member 4 *Mus musculus*  
Ryanodine receptor 2 *Mus musculus*  
AT-rich interactive domain-containing protein 1B *Mus musculus*  
Tetratricopeptide repeat protein 7B *Mus musculus*  
Utrophin *Mus musculus*  
Protein furry homolog *Mus musculus*  
SPRY domain-containing 3 *Mus musculus*  
ANK\_REP\_REGION domain-containing protein *Mus musculus*  
A kinase (PRKA) anchor protein 6 *Mus musculus*  
Disks large homolog 5 *Mus musculus*  
Ras association (RalGDS/AF-6) and pleckstrin homology domains 1 *Mus musculus*  
Transmembrane protein 132B *Mus musculus*  
Amylo-1,6-glucosidase, 4-alpha-glucanotransferase *Mus musculus*  
Unconventional myosin-X *Mus musculus*  
Guanylate cyclase domain-containing protein *Mus musculus*  
Zinc finger CCCH-type-containing 12B *Mus musculus*  
Transient receptor potential cation channel, subfamily M, member 3 *Mus musculus*  
RUN domain-containing protein 3A *Mus musculus*  
Kinesin-like protein KIFC2 *Mus musculus*  
Calsequestrin-2 *Mus musculus*  
Kinesin-like protein KIF3C *Mus musculus*  
Mitogen-activated protein kinase kinase kinase 5 *Mus musculus*

Kinesin-like protein KIFC3 *Mus musculus*  
AP-1 complex subunit beta-1 *Mus musculus*  
Neutral amino acid transporter A *Mus musculus*  
SRSF protein kinase 2 *Mus musculus*  
Regulator of G-protein signaling 9 *Mus musculus*  
Guanylate cyclase soluble subunit beta-1 *Mus musculus*  
Phosphatidylinositol 4-phosphate 5-kinase type-1 gamma *Mus musculus*  
ER membrane protein complex subunit 8 *Mus musculus*  
Serine/threonine-protein kinase ULK1 *Mus musculus*  
E3 ubiquitin-protein ligase TTC3 *Mus musculus*  
Vesicle transport through interaction with t-SNAREs homolog 1B *Mus musculus*  
Metaxin-2 *Mus musculus*  
Protein lin-7 homolog B *Mus musculus*  
cAMP-specific 3',5'-cyclic phosphodiesterase 4A *Mus musculus*  
DNA-directed RNA polymerase II subunit RPB1 *Mus musculus*  
Immunoglobulin superfamily member 11 *Mus musculus*  
Dystrophin *Mus musculus*  
Keratin, type II cytoskeletal 8 *Mus musculus*  
Anion exchange protein 3 *Mus musculus*  
Serine/threonine-protein kinase B-raf *Mus musculus*  
Biglycan *Mus musculus*  
Decorin *Mus musculus*  
Kinesin-like protein KIF3A *Mus musculus*  
AP-1 complex subunit mu-1 *Mus musculus*  
NADPH--cytochrome P450 reductase *Mus musculus*  
Glutamate receptor ionotropic, kainate 2 *Mus musculus*  
Cytochrome c oxidase subunit 6A1, mitochondrial *Mus musculus*  
Histone lysine acetyltransferase CREBBP *Mus musculus*  
Pericentrin *Mus musculus*  
Tyrosine-protein kinase JAK1 *Mus musculus*  
Galactocerebrosidase *Mus musculus*  
Cadherin-5 *Mus musculus*  
Small conductance calcium-activated potassium channel protein 2 *Mus musculus*  
Small conductance calcium-activated potassium channel protein 3 *Mus musculus*  
Myocardin-related transcription factor B *Mus musculus*  
Regulating synaptic membrane exocytosis protein 4 *Mus musculus*  
Leucine-rich repeat and calponin homology domain-containing protein 1 *Mus musculus*  
Guanine nucleotide-binding protein G(I)/G(S)/G(T) subunit beta-2 *Mus musculus*  
Kinesin-associated protein 3 *Mus musculus*  
Unconventional myosin-Ib *Mus musculus*  
Nuclear factor 1 X-type *Mus musculus*  
PDZ and LIM domain protein 4 *Mus musculus*  
Signal transducing adapter molecule 1 *Mus musculus*  
Receptor-type tyrosine-protein phosphatase N2 *Mus musculus*  
Cadherin-8 *Mus musculus*

Lysosomal-trafficking regulator *Mus musculus*  
Peptidyl-glycine alpha-amidating monooxygenase *Mus musculus*  
DNA-directed RNA polymerase II subunit RPB3 *Mus musculus*  
Amyloid-beta A4 precursor protein-binding family A member 2 *Mus musculus*  
Ephrin type-A receptor 4 *Mus musculus*  
Protein enabled homolog *Mus musculus*  
Potassium voltage-gated channel subfamily B member 1 *Mus musculus*  
Cyclin-dependent kinase 16 *Mus musculus*  
Serine/threonine-protein kinase MAK *Mus musculus*  
Formin-1 *Mus musculus*  
Exophilin-5 *Mus musculus*  
MCG18019 *Mus musculus*  
Protein TANC1 *Mus musculus*  
Metabotropic glutamate receptor 2 *Mus musculus*  
Cytospin-A *Mus musculus*  
Protocadherin Fat 4 *Mus musculus*  
Dolichyl-diphosphooligosaccharide--protein glycosyltransferase subunit STT3B  
RIKEN cDNA 2410002F23 gene *Mus musculus*  
NLR family member X1 *Mus musculus*  
Trafficking protein particle complex subunit 10 *Mus musculus*  
Neuropathy target esterase *Mus musculus*  
Microtubule-associated protein 9 *Mus musculus*  
Pre-B-cell leukemia transcription factor-interacting protein 1 *Mus musculus*  
Apoptosis-inducing factor 3 *Mus musculus*  
Trafficking protein particle complex subunit 9 *Mus musculus*  
Prickle-like protein 1 *Mus musculus*  
Uncharacterized protein KIAA0930 homolog *Mus musculus*  
Disabled homolog 2-interacting protein *Mus musculus*  
Adhesion G protein-coupled receptor B1 *Mus musculus*  
Transcription factor HIVEP2 *Mus musculus*  
Zinc finger SWIM domain-containing protein 8 *Mus musculus*  
Serine-rich coiled-coil domain-containing protein 2 *Mus musculus*  
Microtubule cross-linking factor 1 *Mus musculus*  
Serine/threonine-protein kinase PAK 6 *Mus musculus*  
Coiled-coil domain-containing protein 33 *Mus musculus*  
Protein phosphatase 1 regulatory subunit 12C *Mus musculus*  
G protein-regulated inducer of neurite outgrowth 1 *Mus musculus*  
Sarcolemmal membrane-associated protein *Mus musculus*  
Inhibitory synaptic factor 2A *Mus musculus*  
Cyclin-dependent kinase-like 5 *Mus musculus*  
Uncharacterized protein C7orf43 homolog *Mus musculus*  
Ankyrin repeat domain-containing protein 34B *Mus musculus*  
[Pyruvate dehydrogenase [acetyl-transferring]]-phosphatase 1, mitochondrial  
Kinase suppressor of Ras 2 *Mus musculus*  
Metabotropic glutamate receptor 5 *Mus musculus*

ELMO domain-containing protein 1 *Mus musculus*  
Storkhead-box protein 2 *Mus musculus*  
Mitoguardin 1 *Mus musculus*  
E3 ubiquitin-protein ligase HERC2 *Mus musculus*  
Pleckstrin homology domain-containing family G member 3 *Mus musculus*  
Serine/threonine-protein phosphatase 6 regulatory ankyrin repeat subunit A *Mus musculus*  
Inactive tyrosine-protein kinase PRAG1 *Mus musculus*  
BTB/POZ domain-containing protein KCTD16 *Mus musculus*  
Unconventional myosin-XVI *Mus musculus*  
C2 calcium-dependent domain-containing protein 4C *Mus musculus*  
Protein cordon-bleu *Mus musculus*  
Cadherin-12 *Mus musculus*  
Protein SMG7 *Mus musculus*  
Unconventional myosin-Ig *Mus musculus*  
Protein phosphatase Slingshot homolog 2 *Mus musculus*  
Casein kinase II subunit alpha *Mus musculus*  
Syntaxin-binding protein 3 *Mus musculus*  
TNF receptor-associated factor 3 *Mus musculus*  
Reelin *Mus musculus*  
ELAV-like protein 3 *Mus musculus*  
Serine/threonine-protein phosphatase 2A 56 kDa regulatory subunit gamma *Mus musculus*  
Lamina-associated polypeptide 2, isoforms alpha/zeta *Mus musculus*  
Adenomatous polyposis coli protein *Mus musculus*  
B-cell receptor-associated protein 29 *Mus musculus*  
Zinc finger protein 638 *Mus musculus*  
Kinesin-like protein KIF3B *Mus musculus*  
ATP-dependent RNA helicase DDX3Y *Mus musculus*  
Tyrosine-protein kinase JAK2 *Mus musculus*  
Striated muscle-specific serine/threonine-protein kinase *Mus musculus*  
Guanine nucleotide exchange factor DBS *Mus musculus*  
PAN2-PAN3 deadenylation complex subunit Pan3 *Mus musculus*  
NUAK family SNF1-like kinase 1 *Mus musculus*  
Vinculin *Mus musculus*  
Catenin alpha-3 *Mus musculus*  
Solute carrier family 13 member 5 *Mus musculus*  
Uncharacterized protein KIAA1841 *Mus musculus*  
Zinc finger protein 512 *Mus musculus*  
Kazrin *Mus musculus*  
Probable helicase with zinc finger domain *Mus musculus*  
Probable global transcription activator SNF2L2 *Mus musculus*  
Ankyrin repeat and BTB/POZ domain-containing protein BTBD11 *Mus musculus*  
Pannexin-2 *Mus musculus*  
Regulation of nuclear pre-mRNA domain-containing protein 2 *Mus musculus*  
Protein WWC2 *Mus musculus*  
DNA-directed RNA polymerase II subunit GRINL1A *Mus musculus*

5'-AMP-activated protein kinase subunit beta-2 *Mus musculus*  
E3 ubiquitin-protein ligase TRIM37 *Mus musculus*  
Melanoma-associated antigen E1 *Mus musculus*  
Serine/threonine-protein phosphatase 2A 56 kDa regulatory subunit beta isoform *Mus musculus*  
SWI/SNF complex subunit SMARCC2 *Mus musculus*  
CBP80/20-dependent translation initiation factor *Mus musculus*  
GRAM domain-containing protein 2B *Mus musculus*  
Kv channel-interacting protein 4 *Mus musculus*  
Membrane-associated guanylate kinase, WW and PDZ domain-containing protein *Mus musculus*  
Constitutive coactivator of peroxisome proliferator-activated receptor gamma *Mus musculus*  
GRB10-interacting GYF protein 2 *Mus musculus*  
Membrane-associated phosphatidylinositol transfer protein 2 *Mus musculus*  
Protein SMG5 *Mus musculus*  
Serine/threonine-protein kinase TAO2 *Mus musculus*  
Synemin *Mus musculus*  
Protein phosphatase Slingshot homolog 1 *Mus musculus*  
Phospholipid phosphatase-related protein type 4 *Mus musculus*  
Tripartite motif-containing protein 46 *Mus musculus*  
Myb-binding protein 1A *Mus musculus*  
Endoplasmic reticulum junction formation protein lunapark *Mus musculus*  
F-box only protein 10 *Mus musculus*  
Elongator complex protein 1 *Mus musculus*  
Serine/threonine-protein kinase MRCK beta *Mus musculus*  
Protocadherin-19 *Mus musculus*  
Protein phosphatase 1E *Mus musculus*  
R3H domain-containing protein 2 *Mus musculus*  
Nischarin *Mus musculus*  
Neuron navigator 3 *Mus musculus*  
Cullin-9 *Mus musculus*  
Arginine-glutamic acid dipeptide repeats protein *Mus musculus*  
E3 ubiquitin-protein ligase Praja-2 *Mus musculus*  
Dishevelled-associated activator of morphogenesis 2 *Mus musculus*  
Uncharacterized protein KIAA0232 *Mus musculus*  
SEC14 domain and spectrin repeat-containing protein 1 *Mus musculus*  
Probable E3 ubiquitin-protein ligase DTX3 *Mus musculus*  
WD repeat domain phosphoinositide-interacting protein 2 *Mus musculus*  
Volume-regulated anion channel subunit LRRC8A *Mus musculus*  
BTB/POZ domain-containing protein 10 *Mus musculus*  
Dixin *Mus musculus*  
Phospholipase DDHD1 *Mus musculus*  
Death-associated protein kinase 1 *Mus musculus*  
Rho GTPase-activating protein 33 *Mus musculus*  
Myomegalin *Mus musculus*  
Sorting nexin-32 *Mus musculus*  
Sec24-related gene family, member B (*S. cerevisiae*) *Mus musculus*

Protein ZNF365 *Mus musculus*  
CDKN2A-interacting protein *Mus musculus*  
FERM domain-containing protein 4A *Mus musculus*  
Homeobox-containing protein 1 *Mus musculus*  
28S ribosomal protein S27, mitochondrial *Mus musculus*  
Inactive ubiquitin carboxyl-terminal hydrolase 54 *Mus musculus*  
Early endosome antigen 1 *Mus musculus*  
Protein unc-80 homolog *Mus musculus*  
Noelin-2 *Mus musculus*  
Cadherin-7 *Mus musculus*  
Eukaryotic translation initiation factor 4E type 2 *Mus musculus*  
[F-actin]-monooxygenase MICAL2 *Mus musculus*  
Protocadherin Fat 3 *Mus musculus*  
Spermatogenesis-associated protein 2-like protein *Mus musculus*  
Engulfment and cell motility protein 1 *Mus musculus*  
Echinoderm microtubule-associated protein-like 5 *Mus musculus*  
5'-AMP-activated protein kinase catalytic subunit alpha-2 *Mus musculus*  
ADP-ribosylation factor 2 *Mus musculus*  
Sodium bicarbonate cotransporter 3 *Mus musculus*  
Protein FAM163B *Mus musculus*  
Protein O-linked-mannose beta-1,4-N-acetylglucosaminyltransferase 2 *Mus m*  
KN motif and ankyrin repeat domain-containing protein 2 *Mus musculus*  
Intermediate filament family orphan 1 *Mus musculus*  
Arf-GAP with Rho-GAP domain, ANK repeat and PH domain-containing protein  
Stonin-2 *Mus musculus*  
Actin filament-associated protein 1-like 1 *Mus musculus*  
NEDD4-like E3 ubiquitin-protein ligase WWP1 *Mus musculus*  
Double zinc ribbon and ankyrin repeat-containing protein 1 *Mus musculus*  
Striatin-interacting protein 1 *Mus musculus*  
Centrosomal protein of 68 kDa *Mus musculus*  
Thioredoxin-related transmembrane protein 4 *Mus musculus*  
Calmodulin-regulated spectrin-associated protein 2 *Mus musculus*  
G-rich sequence factor 1 *Mus musculus*  
Protein KIAA0556 *Mus musculus*  
E3 ubiquitin-protein ligase Itchy *Mus musculus*  
Striatin-interacting proteins 2 *Mus musculus*  
cAMP and cAMP-inhibited cGMP 3',5'-cyclic phosphodiesterase 10A *Mus muscu*  
APC membrane recruitment protein 2 *Mus musculus*  
Breast carcinoma-amplified sequence 3 homolog *Mus musculus*  
Deubiquitinating protein VCIP135 *Mus musculus*  
DNA-directed RNA polymerase II subunit RPB2 *Mus musculus*  
Adhesion G protein-coupled receptor B2 *Mus musculus*  
Calcium-binding and coiled-coil domain-containing protein 1 *Mus musculus*  
SURP and G-patch domain-containing protein 2 *Mus musculus*  
Metalloreductase STEAP3 *Mus musculus*

Required for meiotic nuclear division protein 1 homolog *Mus musculus*  
Solute carrier family 26 member 6 *Mus musculus*  
Electroneutral sodium bicarbonate exchanger 1 *Mus musculus*  
SH2 domain-containing protein 5 *Mus musculus*  
Spermatogenesis-associated protein 2 *Mus musculus*  
Protein spire homolog 2 *Mus musculus*  
1-phosphatidylinositol 4,5-bisphosphate phosphodiesterase delta-3 *Mus musculus*  
ORC ubiquitin ligase 1 *Mus musculus*  
F-box/SPRY domain-containing protein 1 *Mus musculus*  
Joubertin *Mus musculus*  
Rab effector MyRIP *Mus musculus*  
pre-mRNA 3' end processing protein WDR33 *Mus musculus*  
E3 ubiquitin-protein ligase HECW1 *Mus musculus*  
Nuclear pore complex protein Nup133 *Mus musculus*  
PDZ and LIM domain protein 2 *Mus musculus*  
RUN and FYVE domain-containing protein 2 *Mus musculus*  
Rho guanine nucleotide exchange factor 12 *Mus musculus*  
Neuropilin and tolloid-like protein 1 *Mus musculus*  
E3 ubiquitin-protein ligase MIB2 *Mus musculus*  
Beta-centractin *Mus musculus*  
Calcium/calmodulin-dependent protein kinase kinase 1 *Mus musculus*  
GRIP1-associated protein 1 *Mus musculus*  
Rab-GAP TBC domain-containing protein *Mus musculus*  
EPM2A-interacting protein 1 *Mus musculus*  
Wiskott-Aldrich syndrome protein family member 3 *Mus musculus*  
Nuclear receptor-binding protein 2 *Mus musculus*  
Probable tubulin polyglutamylase TTLL1 *Mus musculus*  
Rho-related BTB domain-containing protein 2 *Mus musculus*  
Golgin subfamily A member 4 *Mus musculus*  
Nuclear receptor coactivator 5 *Mus musculus*  
WW domain-containing oxidoreductase *Mus musculus*  
ATPase WRNIP1 *Mus musculus*  
Phosphatidylinositol 5-phosphate 4-kinase type-2 gamma *Mus musculus*  
Protocadherin gamma C3 *Mus musculus*  
Protocadherin alpha C2 *Mus musculus*  
mRNA-decapping enzyme 1A *Mus musculus*  
Leucine-rich repeat-containing protein 49 *Mus musculus*  
Rho GTPase-activating protein 35 *Mus musculus*  
Leucine zipper putative tumor suppressor 2 *Mus musculus*  
UAP56-interacting factor *Mus musculus*  
Ras and Rab interactor 1 *Mus musculus*  
E3 ubiquitin-protein ligase TRAF7 *Mus musculus*  
DNA-directed RNA polymerases I, II, and III subunit RPABC3 *Mus musculus*  
Kelch-like protein 22 *Mus musculus*  
Nuclear RNA export factor 1 *Mus musculus*

Ubiquitin carboxyl-terminal hydrolase 11 *Mus musculus*  
ER membrane protein complex subunit 3 *Mus musculus*  
WD repeat-containing protein 6 *Mus musculus*  
ATP-dependent RNA helicase DDX50 *Mus musculus*  
Tubulin polyglutamylase complex subunit 1 *Mus musculus*  
RAF proto-oncogene serine/threonine-protein kinase *Mus musculus*  
Partitioning defective 3 homolog *Mus musculus*  
Ras-related protein Rab-27B *Mus musculus*  
Ribosome-binding protein 1 *Mus musculus*  
Actin-related protein 2/3 complex subunit 5 *Mus musculus*  
Plakophilin 2 *Mus musculus*  
39S ribosomal protein L11, mitochondrial *Mus musculus*  
ER membrane protein complex subunit 2 *Mus musculus*  
m7GpppN-mRNA hydrolase *Mus musculus*  
Centrosomal protein of 97 kDa *Mus musculus*  
Nuclear protein MDM1 *Mus musculus*  
Protein ERGIC-53 *Mus musculus*  
Armadillo repeat-containing protein 10 *Mus musculus*  
DUF4939 domain-containing protein *Mus musculus*  
Angiomotin-like protein 1 *Mus musculus*  
ATPase family AAA domain-containing protein 1 *Mus musculus*  
DnaJ homolog subfamily B member 4 *Mus musculus*  
NADH-cytochrome b5 reductase 1 *Mus musculus*  
Tumor protein p63-regulated gene 1-like protein *Mus musculus*  
Sodium-coupled neutral amino acid transporter 3 *Mus musculus*  
Ankyrin *Mus musculus*  
Serine beta-lactamase-like protein LACTB, mitochondrial *Mus musculus*  
C-Jun-amino-terminal kinase-interacting protein 2 *Mus musculus*  
Nuclear distribution protein nudE-like 1 *Mus musculus*  
Pleckstrin homology domain-containing family A member 2 *Mus musculus*  
E3 SUMO-protein ligase RanBP2 *Mus musculus*  
Probable E3 ubiquitin-protein ligase makorin-2 *Mus musculus*  
C-Jun-amino-terminal kinase-interacting protein 3 *Mus musculus*  
72 kDa inositol polyphosphate 5-phosphatase *Mus musculus*  
28S ribosomal protein S34, mitochondrial *Mus musculus*  
Nuclear receptor coactivator 6 *Mus musculus*  
DnaJ homolog subfamily A member 4 *Mus musculus*  
Band 4.1-like protein 4B *Mus musculus*  
Semaphorin-7A *Mus musculus*  
SRC kinase signaling inhibitor 1 *Mus musculus*  
Myeloid leukemia factor 1 *Mus musculus*  
Cytohesin-1 *Mus musculus*  
Protein SON *Mus musculus*  
ADP-ribosylation factor-like protein 10 *Mus musculus*  
Kinesin-like protein KIF21A *Mus musculus*

Nucleoside diphosphate kinase 7 *Mus musculus*  
Actin-related protein 10 *Mus musculus*  
Glypican-1 *Mus musculus*  
Serine racemase *Mus musculus*  
Peroxisomal membrane protein PEX14 *Mus musculus*  
Chloride channel protein 2 *Mus musculus*  
Disintegrin and metalloproteinase domain-containing protein 11 *Mus musculus*  
Serine/threonine-protein kinase TBK1 *Mus musculus*  
Prolactin regulatory element-binding protein *Mus musculus*  
C-Jun-amino-terminal kinase-interacting protein 1 *Mus musculus*  
Cholesterol 24-hydroxylase *Mus musculus*  
Maleylacetoacetate isomerase *Mus musculus*  
PDZ domain-containing protein GIPC1 *Mus musculus*  
SWI/SNF-related matrix-associated actin-dependent regulator of chromatin su  
Nitric oxide synthase, brain *Mus musculus*  
Adenomatous polyposis coli protein 2 *Mus musculus*  
Large proline-rich protein BAG6 *Mus musculus*  
RAS guanyl-releasing protein 1 *Mus musculus*  
STE20/SPS1-related proline-alanine-rich protein kinase *Mus musculus*  
Myotubularin-related protein 1 *Mus musculus*  
Myotubularin-related protein 2 *Mus musculus*  
Succinate--CoA ligase [GDP-forming] subunit beta, mitochondrial *Mus muscul*  
Histone deacetylase 5 *Mus musculus*  
Inward rectifier potassium channel 16 *Mus musculus*  
Inositol 1,4,5-trisphosphate receptor type 2 *Mus musculus*



Der 1 Mus musculus

se 2 Mus musculus

Mus musculus

ulus

culus

S

lus

lus

nusculus

---

*ilus*

3) Mus musculus

Mus musculus

|  |
|--|
|  |
|  |
|  |
|  |
|  |

lus musculus

soform Mus musculus

orm Mus musculus

ein 1 Mus musculus  
Mus musculus

usculus

2 Mus musculus

ilus

ulus



S

ubfamily B member 1 *Mus musculus*

US

| De Luca et al. 2023<br>spermatocytes | Ardeljan et al.<br>2020<br>Breast and ovarian<br>human tumor |
|--------------------------------------|--------------------------------------------------------------|
|--------------------------------------|--------------------------------------------------------------|

|   |   |
|---|---|
| X | X |
| X | X |

|   |   |
|---|---|
|   | X |
| X | X |
|   | X |

|  |   |
|--|---|
|  | X |
|--|---|

X

X

X

X

X

X

X

X
