# Supplementary figures and images for: Steady-state neuron-predominant LINE-1 encoded ORF1p protein and LINE-1 RNA increase with aging in the mouse and human brain
Source: eLife journal article supplement (doi:10.7554/elife.100687), 2024-09-06

Figure 1 – Source data 1

H

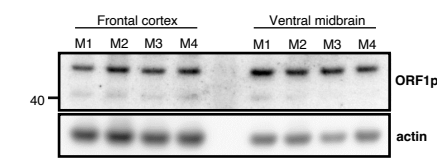

J

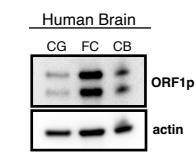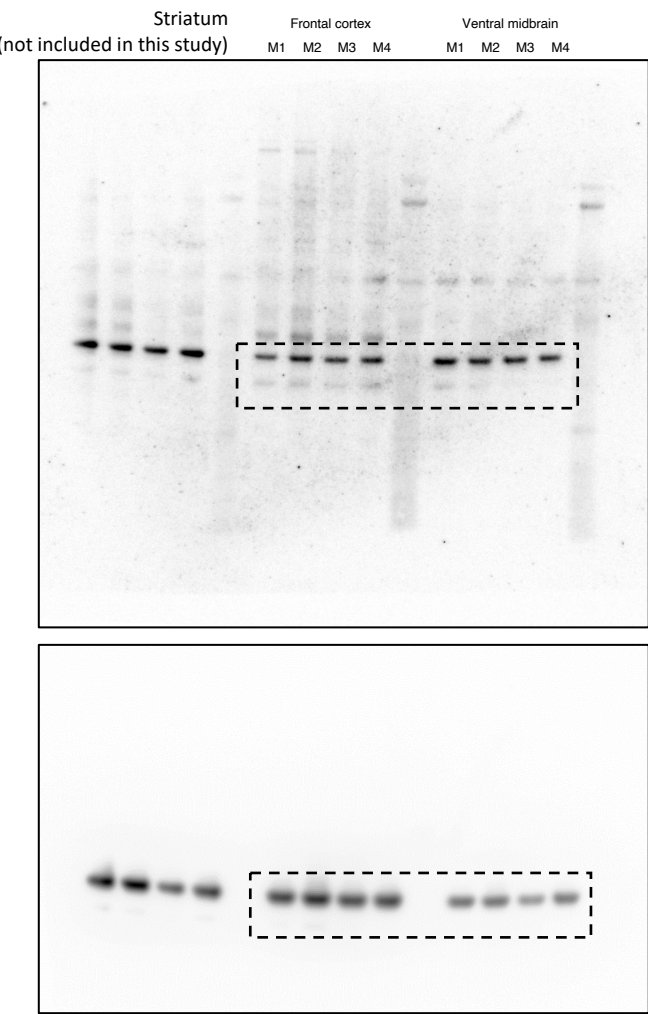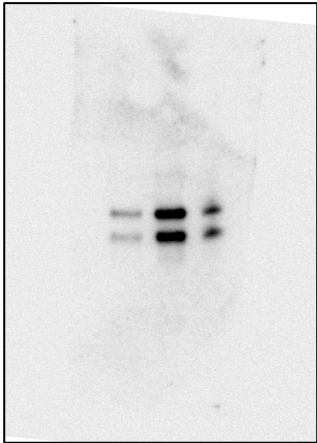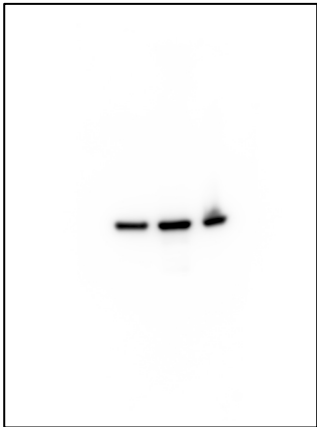

Supplement: fig1-data1 [file Figure 1 - source data.pdf › Figure 1 - source data 1 (pdf) /Figure 1 - source data.pdf]

Figure 1- figure supplement 1 –source data

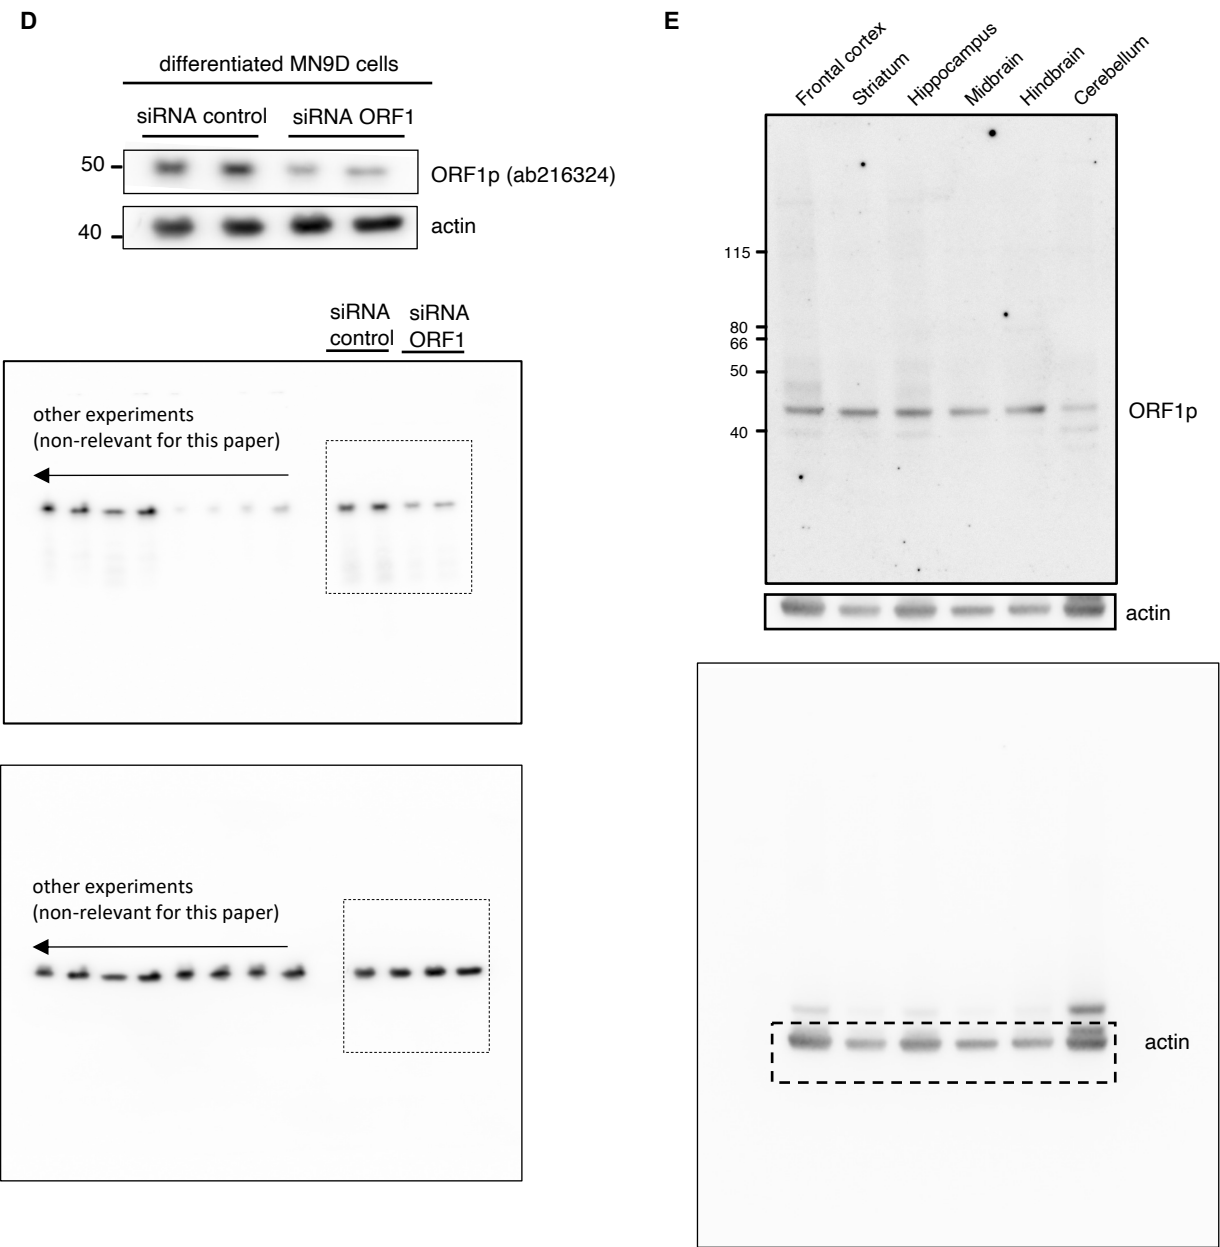

Supplement: fig1-figsupp1-data1 [file Figure 1 - figure supplement 1 - source data .pdf › Figure 1 - figure supplement 1 - source data 1 (pdf)/Figure 1 - figure supplement 1 - source data .pdf]

Figure 1- figure supplement 2- source data 1

A

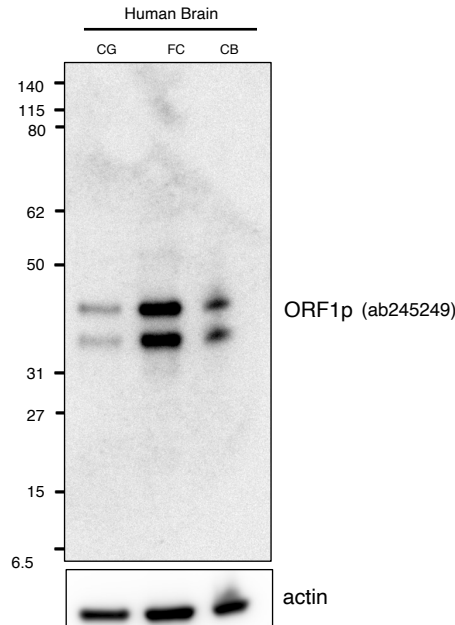

B

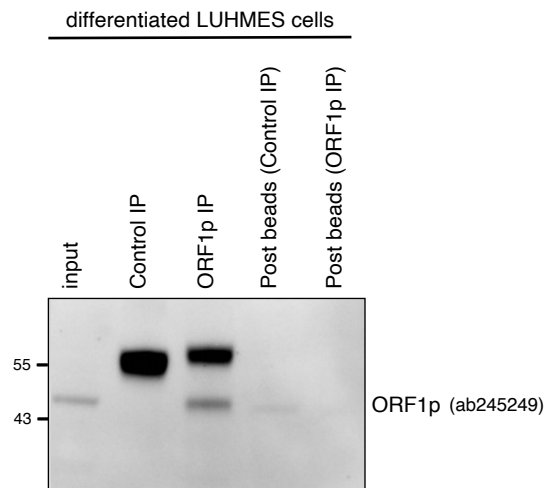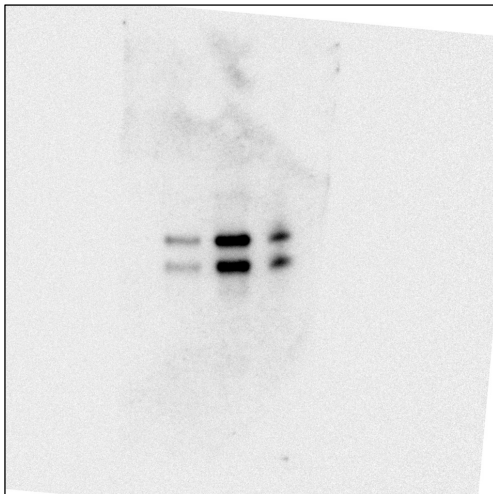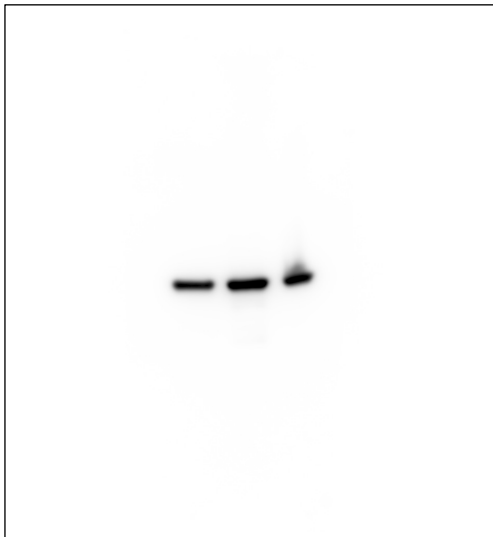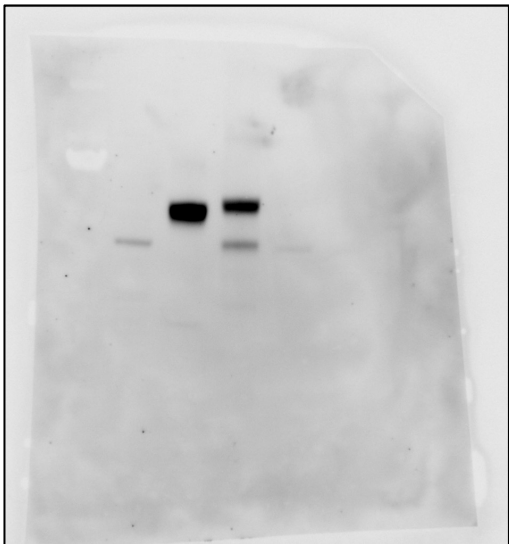

Supplement: fig1-figsupp2-data1 [file Figure 1 - figure supplement 2 - source data 1.pdf › Figure 1 - figure supplement 2 - source data 1 (pdf)/Figure 1 - figure supplement 2 - source data 1.pdf]

Figure 1- figure supplement 2- source data 2

C

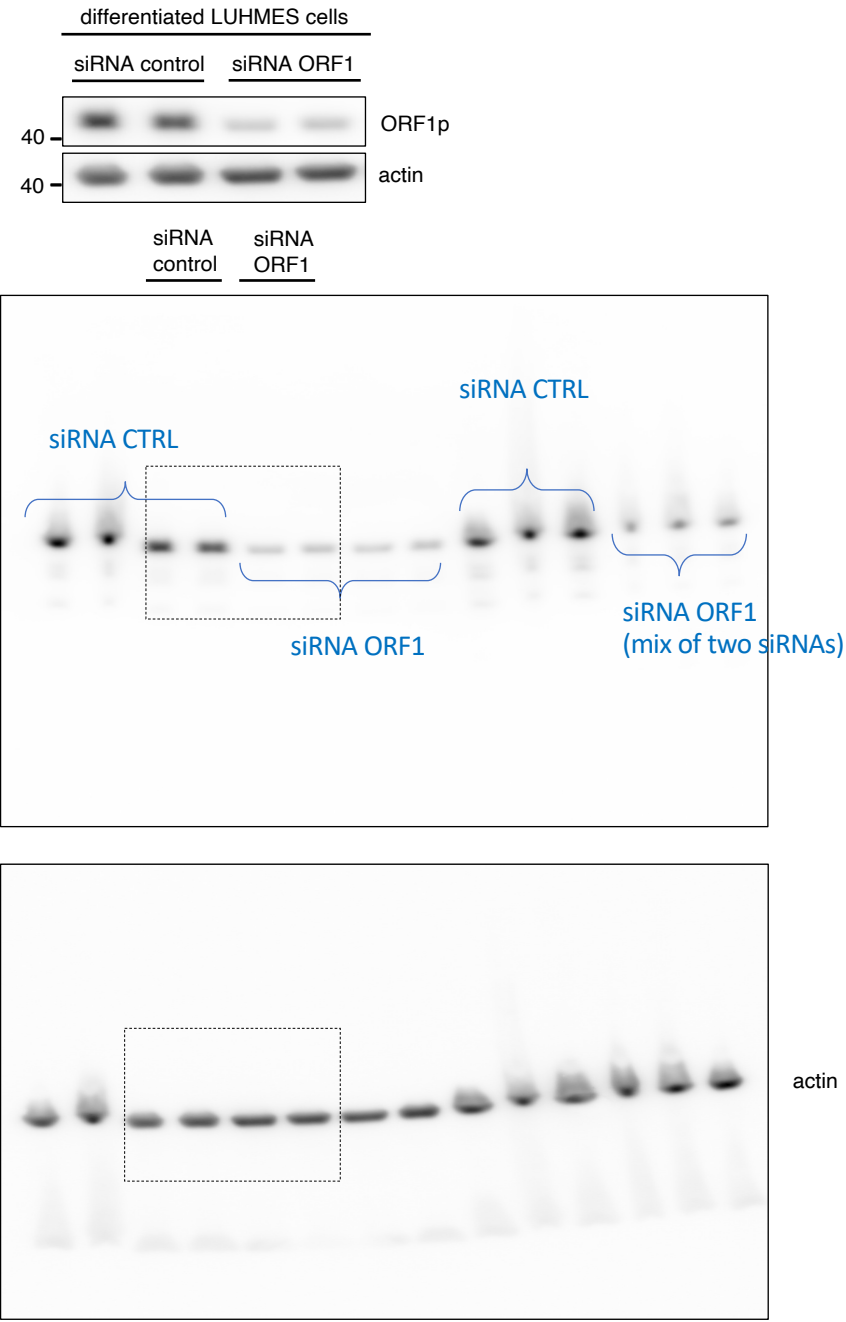

Supplement: fig1-figsupp2-data1 [file Figure 1 - figure supplement 2 - source data 2.pdf › Figure 1 - figure supplement 2 - source data 1 (pdf)/Figure 1 - figure supplement 2 - source data 2.pdf]

Figure 2- Source data 1

G

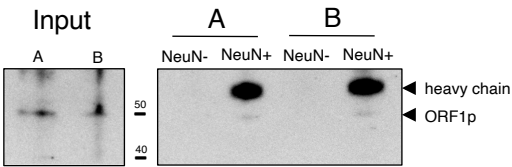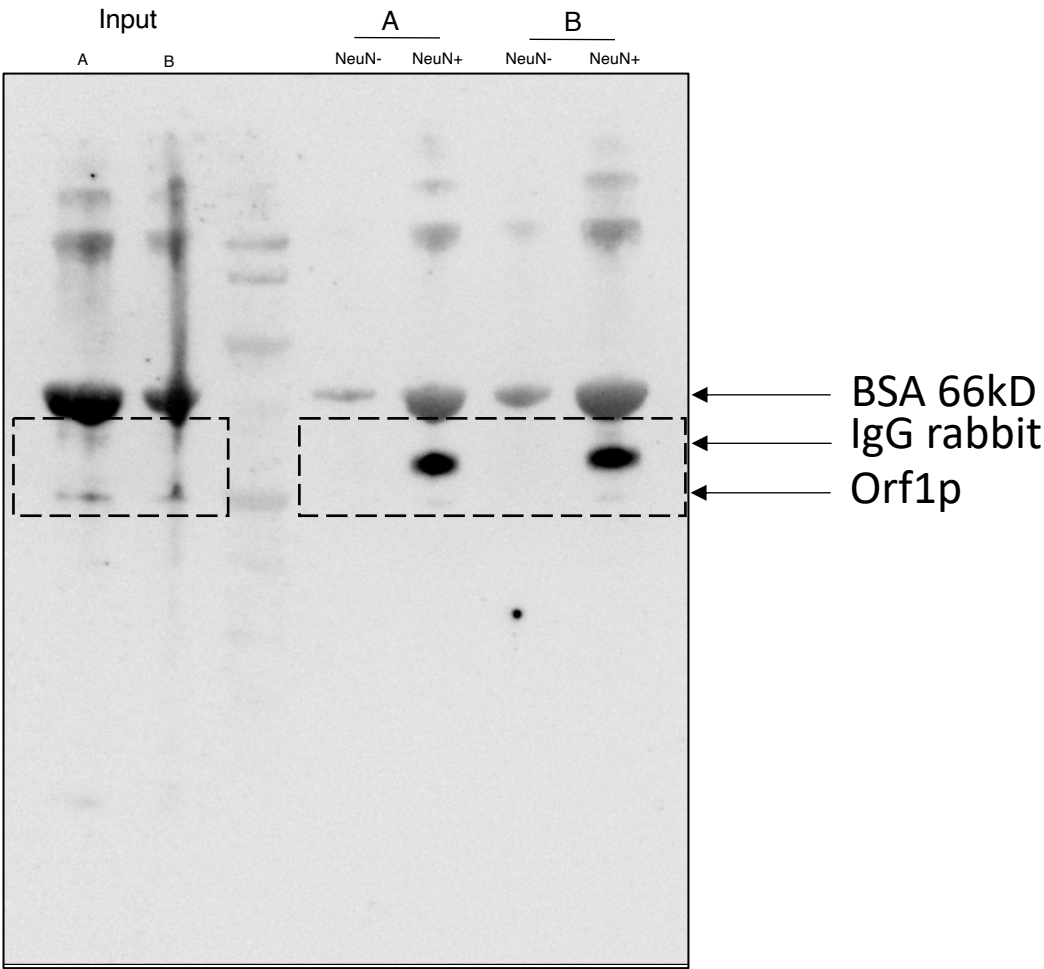

Supplement: fig2-data1 [file Figure 2 - source data.pdf › Figure 2 - source data 1 (pdf)/Figure 2 - source data.pdf]

Figure 6 -Source data 1

A

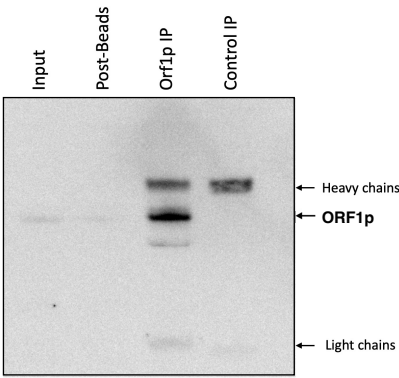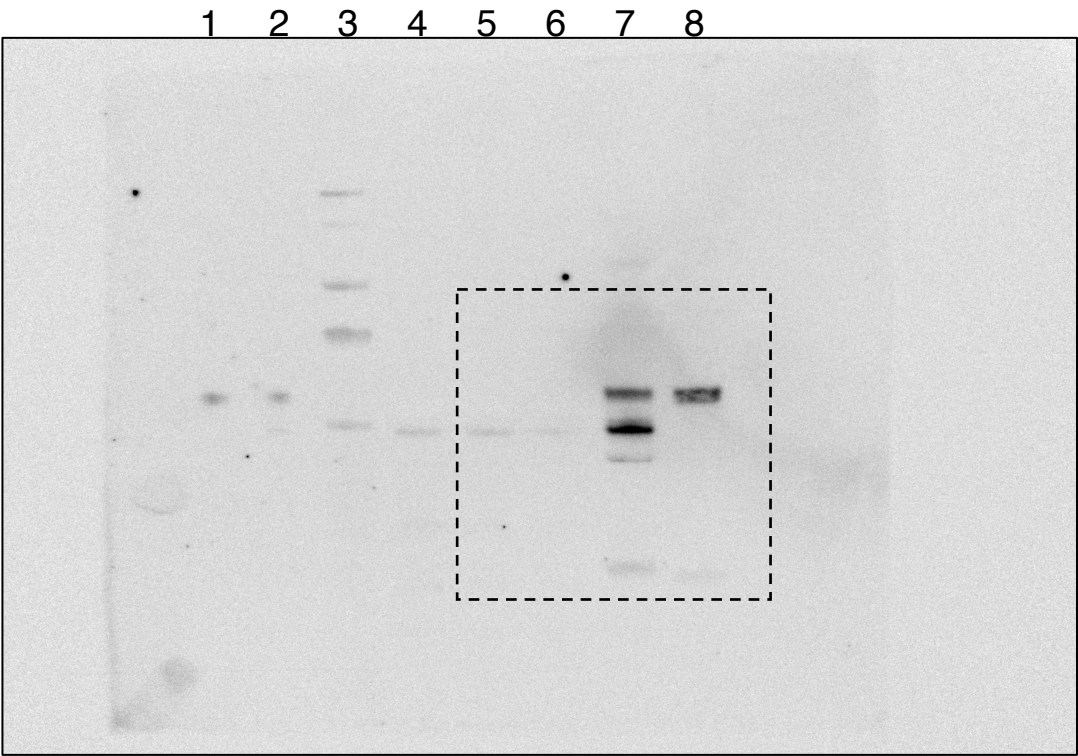

1 = wash #1  
2 = wash #2  
3 = ladder  
4 = IP input  
5 = IP input  
6 = post-beads  
7 = IP ORF1p  
8 = IP IgG

Supplement: fig6-data1 [file Figure 6 - source data 1.pdf › Figure 6 - source data 1 (pdf)/Figure 6 - source data 1.pdf]
